1 **BCL11A interacts with SOX2 to control the expression of epigenetic regulators in**  
2 **lung squamous cell carcinoma**

3

4 **Kyren A. Lazarus<sup>1,7</sup>, Fazal Hadi<sup>1,7</sup>, Elisabetta Zambon<sup>1,7</sup>, Karsten Bach<sup>1,7</sup>, Maria-**  
5 **Francesca Santolla<sup>1,3</sup>, Julie K. Watson<sup>6</sup>, Lucia L. Correia<sup>2</sup>, Madhumita Das<sup>8</sup>,**  
6 **Rosemary Ugur<sup>1,7</sup>, Sara Pensa<sup>1,7</sup>, Lukas Becker<sup>1</sup>, Lia S. Campos, Graham Ladds<sup>1</sup>,**  
7 **Pentao Liu<sup>4</sup>, Gerard Evan<sup>2</sup>, Frank McCaughan<sup>2</sup>, John Le Quesne<sup>8,9,10</sup>, Joo-Hyeon**  
8 **Lee<sup>6</sup>, Dinis Calado<sup>5</sup> and Walid T. Khaled<sup>1,7</sup>**

9

10 **1. Department of Pharmacology, University of Cambridge, Cambridge, UK**

11 **2. Department of Biochemistry, University of Cambridge, Cambridge, UK**

12 **3. Department of Pharmacy, Health and Nutritional Sciences, University of**  
13 **Calabria, Rende, Italy**

14 **4. Wellcome Trust Sanger Institute, Cambridge, UK**

15 **5. The Francis Crick Institute, London, UK**

16 **6. WT-MRC Stem Cell Institute, University of Cambridge, UK**

17 **7. Cambridge Cancer Centre, Cambridge, UK**

18 **8. MRC Toxicology Unit, Lancaster Road, Leicester**

19 **9. Cancer Research Centre, University of Leicester**

20 **10. University Hospitals Leicester NHS trust**

21

22 **Correspondence to: Walid T. Khaled ([wtk22@cam.ac.uk](mailto:wtk22@cam.ac.uk))**

23

24

25 **Abstract**

26 Patients diagnosed with lung squamous cell carcinoma (LUSC) have limited targeted  
27 therapeutic options. We report here the identification and characterisation of the  
28 transcriptional regulator, *BCL11A*, as a LUSC oncogene. Analysis of cancer genomics  
29 datasets revealed *BCL11A* to be upregulated in LUSC but not lung adenocarcinoma  
30 (LUAD). We demonstrated that knockdown of *BCL11A* in LUSC cell lines abolished  
31 xenograft tumour growth and its overexpression *in vivo* led to lung airway hyperplasia  
32 and the development of reserve cell hyperplastic lesions. In addition, deletion of *Bcl11a*  
33 in the tracheal basal cells abolished the development of tracheosphere organoids while  
34 its overexpression led to solid tracheospheres with a squamous phenotype. At the  
35 molecular level we found *BCL11A* to be a target of SOX2 and we show that it is  
36 required for the oncogenic role of SOX2 in LUSC. Furthermore, we showed that  
37 *BCL11A* and SOX2 interact at the protein level and that together they co-regulated the  
38 expression of several transcription factors. We demonstrate that pharmacological  
39 inhibition of SETD8, a gene co-regulated by BCL11A and SOX2, alone or in  
40 combination with cisplatin treatment, shows significant selectivity to LUSC in  
41 comparison to LUAD cells. Collectively, these results indicate that the disruption of the  
42 BCL11A-SOX2 transcriptional program provides a future framework for the  
43 development of targeted therapeutic intervention for LUSC patients.

44

45

46 **Main**

47 Lung cancer accounts for the highest rate of cancer related diagnosis and mortality  
48 worldwide<sup>1</sup>. Broadly, there are two major types of lung cancer; small cell lung cancer  
49 (SCLC) accounting for 15% of the cases and non-small cell lung cancer (NSCLC)  
50 accounting for 85% of cases<sup>1</sup>. NSCLC patients have a poor outcome in the clinic with  
51 only 15% of patients surviving five years or more<sup>2</sup>. At present NSCLC is defined histo-  
52 pathologically in the clinic into four broad categories: lung adenocarcinoma (LUAD),  
53 lung squamous cell carcinoma (LUSC), large cell carcinoma and undifferentiated non-  
54 small cell lung cancer. LUAD and LUSC are the most common types of NSCLC (90%  
55 of cases). LUSC accounts for more than 400,000 deaths worldwide each year<sup>3</sup> and  
56 unlike LUAD there are limited targeted therapies available for LUSC. Platinum-based  
57 chemotherapy remains the first-line treatment for LUSC and although the recent FDA  
58 approval of Necitumumab in combination with platinum-based chemotherapy for  
59 metastatic LUSC has shown positive signs, a great deal of work still needs to be done in  
60 this field<sup>4</sup>.

61

62 At the cellular level, LUAD tends to originate from the secretory epithelial cells in the  
63 lung while LUSC usually originates from basal cells in the main and central airways<sup>2</sup>.  
64 At the molecular level LUAD is known to harbour mutations in epidermal growth factor  
65 receptor (EGFR), V-Ki-Ras2 Kirsten Rat Sarcoma Viral Oncogene Homolog (KRAS)  
66 and Anaplastic Lymphoma Receptor Tyrosine Kinase (ALK), which are also well  
67 modelled and studied both *in vitro* and *in vivo* (for review see <sup>5,6</sup>). On the other hand  
68 LUSC is less studied but it is known that amplifications of SRY (Sex Determining  
69 Region Y)-Box 2 (SOX2) tends to be present in 70-80% of patients<sup>7-10</sup>.

70

71 Recently, a detailed picture of the molecular differences between LUAD and LUSC has  
72 been made available through ‘The Cancer Genome Atlas’ (TCGA)<sup>11,12</sup>. To identify key  
73 drivers responsible for the differences between LUAD and LUSC we reanalysed the  
74 gene expression data from TCGA and focused on all 1500 transcriptional regulators in  
75 the genome. As reported previously *SOX2* was the most amplified gene in LUSC and its  
76 expression level was also significantly higher in LUSC vs. LUAD (Figure 1a and  
77 Supplementary Fig. 1a). The second most amplified locus in LUSC patients revealed by  
78 TCGA analysis contains the transcription factors *BCL11A* and *REL*<sup>11,12</sup>. *BCL11A* has  
79 been shown to be an oncogene in B-cell lymphoma and triple negative breast cancer<sup>13-</sup>  
80 <sup>16</sup>.

81

82 We found that *BCL11A* expression levels were also significantly higher in LUSC vs.  
83 LUAD (Figure 1a and Supplementary Figure 1a). Moreover, the expression of both  
84 *BCL11A* and *SOX2* was significantly higher in LUSC but not LUAD tumour samples  
85 compared to patient matched normal samples (Figure 1b-c and Supplementary Figure  
86 1b-c) supporting a driver role for these transcription factors in LUSC pathology. In  
87 contrast, *REL* expression was not different between LUSC and LUAD (Figure 1a-c and  
88 Supplementary Figure 1a-c) suggesting that *BCL11A* amplification is a key driving  
89 event in LUSC. This observation is supported by the recent report from the TRACERx  
90 (TRACKing Cancer Evolution through therapy (Rx)) study demonstrating the  
91 amplification of *BCL11A* as an early event in LUSC<sup>17</sup>. Furthermore, BCL11A IHC  
92 staining on LUAD (n=99) and LUSC (n=120) TMAs revealed little or no staining in  
93 99% of LUAD patients. In contrast, 25% of LUSC patients had moderate staining and  
94 24% of LUSC patients had strong staining, which is in agreement with previous IHC

95 staining of NSCLC tumours<sup>18</sup>. This confirms our transcriptomic analyses indicating the  
96 specificity of *BCL11A* in LUSC patients.

97 To determine if high levels of *BCL11A* expression are oncogenic in LUSC, we  
98 performed shRNA mediated knockdown (KD) of *BCL11A* using two independent  
99 shRNAs in two LUSC cell lines, LK2 and H520 (Supplementary Fig. 2a and b). We  
100 first tested the clonogenic capacity of control or *BCL11A-KD* cells by seeding them into  
101 matrigel for 3D colony formation assays. We found that *BCL11A-KD* cells had a  
102 significant reduction in colony formation capacity (Supplementary Fig. 2c and d). We  
103 then injected control or *BCL11A-KD* cells into immune compromised mice to test for  
104 their tumour formation capacity and found a significant reduction in tumour burden  
105 from *BCL11A-KD* cells compared to control cells (Fig 1e and f). In addition, we found  
106 the squamous markers *KRT5* and *TP63* levels were significantly reduced in *BCL11A-*  
107 *KD* cells (Supplementary Figure 2e-h) suggesting an integral role for *BCL11A* in  
108 driving the LUSC phenotype. Moreover, to test if the role of *BCL11A* is context  
109 dependant we knocked down *BCL11A* in an LUAD cell line H1792 and found no  
110 change in 3D colony growth (Supplementary Figure 2i-j). Finally, at the molecular level  
111 we found no change in the expression of *SOX2* in *BCL11A-KD* cells (Supplementary  
112 Figure 2k, l).

113

114 To explore the role of *BCL11A* in lung biology, we utilised a novel Cre-inducible  
115 mouse model that allows for the overexpression of *BCL11A*. Essentially, *BCL11A* was  
116 inserted into the *Rosa26* locus with a LoxP-Stop-LoxP (*LSL*) cassette upstream, under  
117 the control of a GAGG promoter, thus preventing the expression of *BCL11A* unless the  
118 *LSL* is excised by Cre recombinase. To test the effect of *BCL11A* overexpression on  
119 lung morphology, we allowed the *BCL11A*-overexpression (*BCL11A<sup>ovx</sup>*) mice to inhale

120 Adenovirus-Cre (Figure 2a). Eight months after infection, we analysed the lungs and  
121 found an increase in airway hyperplasia (Figure 2b-c) accompanied by aggregates of  
122 small hyperchromatic cells with irregular nuclei that represent reserve cell hyperplasia  
123 (Figure 2b, arrows) which are precursors to squamous metaplasia<sup>19</sup>. IHC analysis of the  
124 lungs from *BCL11A<sup>ovx</sup>* also indicated an increase in positivity for the proliferative  
125 marker Ki-67 (Supplementary Figure 3a) and Sox2 indicating a transition to squamous  
126 differentiation (Supplementary Figure 3b). However, we found little difference in Cc10,  
127 Krt5 and Trp63 staining at this stage (Supplementary Figure 3a and b).

128

129 To further investigate the role of *BCL11A* in LUSC, we employed a recently described  
130 3D organoid culture system for basal cells (BCs) from the trachea, as they have been  
131 suggested to be the cell of origin for LUSC<sup>20</sup>. BCs from human and mouse lungs have  
132 higher expression of *BCL11A* when compared to the other epithelial compartments  
133 (Supplementary Figure 4a and b)<sup>21</sup>. Therefore, we crossed the *BCL11A<sup>ovx</sup>* mice to *R26-*  
134 *CreERT2* mice, which allowed us to induce Cre recombination by the administration of  
135 tamoxifen. In addition, we also used the previously reported *Bcl11a* conditional  
136 knockout mouse under the control of *R26-CreERT2* (called *Bcl11a<sup>CKO</sup>* from this point)  
137 to elucidate the importance of BCL11A in organoid formation (Figure 2a).

138

139 We found that in contrast to the hollow organoids normally formed by wild-type BCs,  
140 BCs from *BCL11A<sup>ovx</sup>* mice formed solid organoid structures with no hollow lumen  
141 suggesting hyper-proliferation and loss of organisation (Figure 2d). However, BCs from  
142 *Bcl11a<sup>cko</sup>* mice failed to form any organoid structures suggesting that *Bcl11a* is  
143 necessary for stem cell potential in organoid formation (Figure 2d). Quantitative

144 analysis revealed a significant decrease in organoid numbers from *Bcl11a*<sup>cko</sup> BCs but no  
145 significant difference in *BCL11A*<sup>ovx</sup> BCs (Supplementary Figure 4c-e).

146

147 H&E staining confirmed the hollowness of the organoids from the control mice which  
148 was in stark contrast to the filled organoids from the *BCL11A*<sup>ovx</sup> mice (Figure 2e and  
149 Supplementary Figure 5). IF staining revealed that the *BCL11A*<sup>ovx</sup> organoids were also  
150 positive for Ki-67 (Supplementary Figure 5), Sox2, Krt5, Trp63 and negative for the  
151 luminal marker Krt8 (Figure 2e and Supplementary Figure 6) indicating that BCL11A  
152 maintains a squamous phenotype.

153

154 Given the importance of SOX2 in driving LUSC<sup>8,9</sup> we next investigated if *BCL11A* is  
155 regulated by SOX2. To achieve this, we knocked down *SOX2* (*SOX2-KD*) in two LUSC  
156 cell lines using two independent shRNAs (Figure 3a, b and Supplementary Figure 7a,  
157 b). Similar to *BCL11A* we found that *SOX2-KD* cells had a significantly reduced colony  
158 and tumour formation abilities (Supplementary Figure 7c-f). At the molecular level we  
159 found a significant reduction in the expression levels of *BCL11A* and similar to  
160 *BCL11A-KD*, reduction in squamous markers *KRT5* and *TP63* in the *SOX2-KD* cells  
161 (Figure 3c, d and Supplementary Figure 7g-j).

162

163 To investigate if BCL11A is required for SOX2 mediated oncogenesis we introduced a  
164 doxycycline inducible *BCL11A* overexpression vector into *SOX2-KD* cell lines and  
165 found that *BCL11A* overexpression partially rescues the colony and tumour formation  
166 abilities of *SOX2-KD* cells (Figure 3e-h, f and Supplementary Figure 8a-c). These  
167 results suggest that BCL11A is partially responsible for some of SOX2's mediated  
168 transcriptional changes in LUSC cells.

169

170 To understand how BCL11A and SOX2 contribute to the LUSC transcriptional  
171 programme we performed BCL11A and SOX2 ChIP-Seq analysis on LK2 cells in the  
172 presence or absence of BCL11A (*BCL11A-KD*) (Figure 3i). We identified 49,575 peaks  
173 for SOX2 and 4,904 peaks for BCL11A (Figure 3j and Supplementary Tables 1 and 2).  
174 Out of the 4,904 BCL11A peaks identified, 3,941 were not present in *BCL11A-KD* cells  
175 validating the true nature of BCL11A binding at these regions of the genome.

176

177 We then compared the BCL11A peaks and the SOX2 peaks and identified 958 peaks,  
178 which overlap suggesting co-regulation of these genes (Figure 3i and j). Subsequently,  
179 we identified the nearest genes to the common peaks (Supplementary Table 3) and  
180 performed Gene Ontology (GO) analysis to identify if these common peaks are enriched  
181 for specific biological process (Figure 3j). The top hits from the GO analysis revealed  
182 enrichment for transcriptional and epigenetic regulators including *SETD8*, *SKIL*, and  
183 *TBX2* (Figure 3k). We also found that SOX2 binds the *BCL11A* locus at multiple sites  
184 suggesting a strong direct regulation at the transcriptional level further supporting the  
185 data in Figure 3c and d (Figure 3k). BCL11A and SOX2 peaks on *SETD8*<sup>22,23</sup>, *SKIL*<sup>24</sup>,  
186 *TBX2*<sup>25</sup> and *BCL11A* were validated and confirmed by ChIP-qPCR (Supplementary  
187 Figure 9). The overlap of the ChIP-Seq peaks suggests a direct interaction between  
188 BCL11A and SOX2 proteins, which was confirmed in co-immunoprecipitation  
189 experiments on LK2 and H520 (Supplementary Figure 10a, b).

190

191 We then investigated the expression of *SETD8*, *SKIL* and *TBX2* in *BCL11A-KD* or  
192 *SOX2-KD* cells. Interestingly, we found a modest reduction in the expression of these  
193 genes in *BCL11A-KD*, which was more pronounced in *SOX2-KD* cells (Figure 4a-d; and



194 Supplementary Figure 10c-j). This indicates that SOX2 has a major role in the  
195 regulation of *BCL11A*, which together with SOX2 drives the expression of key  
196 epigenetic regulators such as *SETD8*, *SKIL* and *TBX2*. This results suggest that  
197 disrupting the BCL11A-SOX2 transcriptional program might selectively target LUSC  
198 cells. To test this hypothesis we focused on SETD8 for its biology and the availability  
199 of multiple inhibitors. SETD8 is a member of the SET domain containing family and is  
200 known to catalyse the monomethylation of histone H4 Lys20<sup>22,23</sup> which is involved in  
201 recruiting signalling proteins or chromatin modifications<sup>26</sup>. In addition, SETD8 has  
202 been shown to play a role in maintaining skin differentiation<sup>27</sup> and is dysregulated in  
203 multiple cancer types<sup>28-30</sup>.

204

205 We first assessed the expression of *SETD8* in multiple NSCLC cell lines and found that  
206 *SETD8* expression was significantly higher in LUSC cell lines (n=5) compared to  
207 LUAD cell lines (n=6) (Figure 4e) which was in correlation with the expression levels  
208 of *BCL11A* and *SOX2* (Figure 4f and g). Analysis of TCGA datasets revealed that  
209 SETD8 expression correlates with BCL11A and SOX2 expression in LUSC patients  
210 (Supplementary figure 11a and b). Next, we tested if LUSC lines are more sensitive to  
211 SETD8 inhibition. There are few SETD8 inhibitors but we focussed on one with proven  
212 cellular activity<sup>31,32</sup>, named NSC663284. NSC663284 has also been reported as an  
213 inhibitor of Cdc25<sup>33-35</sup>. We treated all the NSCLC cell lines (n=11) with a range of  
214 NSC663284 concentrations (full details of setup in materials and methods) for 72 hours  
215 and measured cell viability. Remarkably, we found that LUSC cells had significantly  
216 lower IC<sub>50</sub> (average 0.30  $\mu$ M) compared to LUAD cells (average 7.65  $\mu$ M) (Figure 4h  
217 and i). To understand if SETD8 inhibition would add a clinical benefit to patients, we  
218 tested the effect of combining NSC663284 and cisplatin. First, we found that cisplatin

219 treatment for 24hrs alone affected LUSC and LUAD in a similar way with both cell  
220 types demonstrating a similar  $IC_{50}$  (LUAD = 64.12  $\mu$ M and LUSC = 31.67  $\mu$ M) (Figure  
221 4j and k). However, if we pre-treat NSCLC cell lines with NSC663284 for 48hrs and  
222 then combine cisplatin with NSC663284 for a further 24hrs we found that LUSC ( $IC_{50}$   
223 = 4.66  $\mu$ M) cells are more sensitive to cisplatin than LUAD cells ( $IC_{50}$  = 32.21  $\mu$ M)  
224 (Figure 4l, m).

225

226 In summary, we have demonstrated in this study that *BCL11A* is a LUSC oncogene.  
227 We have shown that *BCL11A* is a key target of SOX2 and together they co-regulate the  
228 expression of epigenetic regulators in LUSC cells. Our data suggests that disrupting the  
229 *BCL11A*-SOX2 transcriptional program might selectively target LUSC cells. This was  
230 demonstrated by the sensitivity of LUSC cell lines to the inhibition of the  
231 *BCL11A*/SOX2 co-regulated gene *SETD8*. Collectively, these results indicate the key  
232 oncogenic role of *BCL11A* in LUSC and provide a future framework for the  
233 development of targeted therapeutic intervention for LUSC patients.

234

235

236

237 **Figure Legends**

238

239 **Figure 1. *BCL11A* is a lung squamous cell carcinoma (LUSC) oncogene**

240 **(a)** Volcano plots of The Cancer Genome Atlas (TCGA) RNAseq data<sup>11,12</sup> indicating  
241 that *BCL11A* and *SOX2* are higher expressed in LUSC compared to lung  
242 adenocarcinoma (LUAD). The plot shows that *REL* is not differentially expressed in  
243 LUSC vs LUAD patients. The x-axis represents log<sub>2</sub> expression fold-change (FC) in  
244 LUSC patients vs LUAD patients and the y-axis represents  $-\log_{10}(\text{pValue})$ . The  
245 vertical dashed lines represent FC = 1.0 and the horizontal dashed line represents p  
246 value = 0.01. **(b)** Volcano plots indicating that *BCL11A* and *SOX2* are differentially  
247 expressed in LUSC patients vs matched normal samples. The plot indicates that *REL* is  
248 not differentially expressed in LUSC vs matched normal samples **(c)** Volcano plots  
249 indicating that neither *BCL11A*, *SOX2* nor *REL* are differentially expressed in LUAD  
250 patients vs matched normal. **(d)** Images and scoring of *BCL11A* IHC staining on LUAD  
251 and LUSC tumours (see Methods for scoring). Graph depicting reduction in tumour size  
252 observed when shRNA1 or shRNA2 transfected LK2 **(e)** and H520 **(f)** cells are injected  
253 subcutaneously into mice compared to control. Five mice per cell line were monitored  
254 for 25 days after which tumours were removed and measured. On the right are images  
255 showing actual tumours measured. Data presented as mean  $\pm$  s.d. One way ANOVA  
256 with post Dunnett test performed, \* indicates p<0.05 and \*\* p<0.005 and \*\*\* indicates  
257 p<0.001.

258

259 **Figure 2. *BCL11A* overexpression leads to thickening of the airways and abnormal**  
260 **organoid formation**

261 **(a)** Schematic representing strategy to explore the role of *BCL11A* *in vivo* and *ex vivo*.

262 Left Panel: Adenovirus-Cre was nasally administered to *BCL11A<sup>ovx</sup>* mice and the lungs

263 were analysed after eight months. Right panel: for the tracheosphere organoid model,

264 basal cells from the trachea of either *BCL11A<sup>ovx</sup>* or *BCL11A<sup>cko</sup>* mice were FACS sorted,

265 embedded in matrigel and analysed after 15 days. Three independent mice were used for

266 each experiment. **(b)** Images of airways from control and *BCL11A<sup>ovx</sup>*. Arrows indicate

267 small hyperchromatic cells with irregular nuclei. **(c)** Quantification of airway epithelial

268 layer hyperplasia from two control and *BCL11A<sup>ovx</sup>* mice. **(d)** Bright field images of

269 organoids from *Bcl11a<sup>cko</sup>* and *BCL11A<sup>ovx</sup>* mice treated with vehicle or tamoxifen. **(e)**

270 Sectioned organoids from *BCL11A<sup>ovx</sup>* mice stained with haematoxylin and eosin,

271 BCL11A, Sox2, Krt5, Trp63 and Krt8. Scale bar indicates 50µm.

272

273 **Figure 3. BCL11A and SOX2 occupy independent and common loci in the genome**  
274 **of LUSC cells**

275 **(a and b)** Western blot showing SOX2 and BCL11A expression in *SOX2-KD* in LK2

276 **(a)** and H520 **(b)** cells transfected with control (scramble), shRNA1 or shRNA2 vectors.

277 **(c and d)** *BCL11A* expression in *SOX2-KD* LK2 **(c)** and H520 **(d)** cells. **(e)** Western

278 blot showing BCL11A rescue in *SOX2-KD* cells. Doxycycline (Dox) inducible *BCL11A*

279 overexpression vector was transfected into control and *SOX2* shRNA1 LK2 cells and

280 Dox treatment was performed for 48 hours. **(f)** Graph depicting 3D matrigel assay in

281 control, *SOX2-KD* and *BCL11A* rescue cells indicating a partial rescue in *SOX2-KD*,

282 *BCL11A* overexpressing cells. **(g)** Graph indicating partial rescue of tumour size from

283 *BCL11A* overexpressing *SOX2-KD* cells injected subcutaneously. **(h)** Images of actual

284 tumours measured. Four mice per cell line were monitored for 15 days after which  
285 tumours were removed and measured. Data presented as mean  $\pm$  s.d. (n=4). One way  
286 Anova test performed, \* indicates  $p < 0.05$  and \*\*  $p < 0.005$  and \*\*\* indicates  $p < 0.001$ . **(i)**  
287 LK2 cell line either transfected with control or shRNA1 vectors were used for BCL11A  
288 and SOX2 ChIP-Seq. Heatmaps showing BCL11A only, SOX2 only or common peaks  
289 in BCL11A or SOX2 IP in control and *BCL11A*-KD cells. **(j)** Venn diagram indicating  
290 the overlap of BCL11A and SOX2 target genes in LK2 cells. BCL11A target genes  
291 were derived by comparing BCL11A IP in control vs BCL11A-KD cells. Any peaks  
292 lost in BCL11A-KD cells were considered as a ‘true peak’ and included as a bona fide  
293 BCL11A target gene. SOX2 target genes were derived from SOX2 IP in LK2 control  
294 cells. Image below show top five biological GO terms from GO analysis performed  
295 using DAVID. **(k)** IGV genome browser views for *SETD8*, *SKIL*, *TBX2* and *BCL11A*.

296

297 **Figure 4. SETD8 inhibition preferentially sensitises LUSC cell lines to**  
298 **chemotherapy**

299 **(a-d)** Graph depicting *SETD8* gene expression in LK2, H520 *BCL11A*-KD and LK2,  
300 H520 *SOX2* KD cells. Data presented as mean  $\pm$  s.d. (n=3). One way ANOVA with post  
301 Dunnett test performed, \* indicates  $p < 0.05$  and \*\*  $p < 0.005$  and \*\*\* indicates  $p < 0.001$ .  
302 **(e)** *SETD8* gene expression in NSCLC cell lines. **(f)** *BCL11A* gene expression in  
303 NSCLC cell lines. **(g)** *SOX2* gene expression in NSCLC cell lines. **(h)** Dose-response  
304 curves were derived by treating NSCLC cell lines with SETD8 inhibitor NSC663284.  
305 1000 cells were seeded and allowed to recover for 24 hours. The inhibitor was then  
306 added at increasing concentrations to LUSC (red) and LUAD (blue) cells and Cell Titre  
307 (see Methods) assay was performed after 72 hours. **(i)**  $IC_{50}$  values were derived from the  
308 dose-response assay indicating LUSC cells are significantly more responsive to SETD8

309 inhibition than LUAD cells. **(j)** Dose-response curves were derived by treating NSCLC  
310 cell lines with cisplatin as above. **(k)** IC<sub>50</sub> values were derived from the dose-response  
311 assay indicating cisplatin effects LUSC and LUAD cells equally. **(l)** Dose-response  
312 curves derived from treating NSCLC cell lines with cisplatin and NSC663284 IC<sub>50</sub>  
313 concentration for each cell line as above. **(m)** IC<sub>50</sub> values were derived from the dose-  
314 response assay indicating SETD8 inhibition preferentially enhances cisplatin efficacy in  
315 LUSC cells. Data presented as mean ± s.d. (LUSC n=5 and LUAD n=6). Student's t-test  
316 performed, \* indicates p<0.05 and \*\* p<0.005 and \*\*\* indicates p<0.001.

317

318 **Supplementary Figure 1. BCL11A, SOX2, and REL expression in Lung TCGA**  
319 **dataset**

320 **(a)** Violin plot showing *BCL11A*, *SOX2* and *REL* expression in LUSC vs LUAD.  
321 FPKM, fragments per kilobase per million mapped reads. **(b)** Violin plot showing  
322 *BCL11A*, *SOX2* and *REL* expression in LUSC tumour vs normal matched patients. **(c)**  
323 Violin plot showing *BCL11A*, *SOX2* and *REL* expression in LUAD tumour vs normal  
324 matched patients.

325

326 **Supplementary Figure 2. BCL11A KD reduces squamous markers in LUSC cells**

327 **(a and b)** qPCR and western blot shows *BCL11A* reduction in LK2 **(a)** and H520 **(b)**  
328 cells transfected with shRNA1 and shRNA2 vectors. **(c and d)** Comparison of colony  
329 numbers in 3D matrigel assay from control, shRNA1 or shRNA2 in LK2 **(c)** and **(d)**  
330 H520 cells. Data presented as mean ± s.d. (n=3). **(e and f)** *KRT5* expression is reduced  
331 in LK2 **(e)** and H520 **(f)** *BCL11A-KD* cells. **(g and h)** *TP63* expression is reduced in  
332 LK2 **(g)** and H520 **(h)** *BCL11A-KD* cells. **(i)** qPCR and western blot shows BCL11A  
333 reduction in H1792 cells transfected with shRNA1 and shRNA2 vectors. **(j)**

334 Comparison of colony numbers in 3D matrigel assay from control, shRNA1 or shRNA2  
335 in H1792 cells. **(k and l)** *SOX2* expression is unchanged in LK2 **(k)** and H520 **(l)**  
336 *BCL11A-KD* cells. Data presented as mean  $\pm$  s.d. One way ANOVA with post Dunnett  
337 test performed, \* indicates  $p < 0.05$  and \*\*  $p < 0.005$  and \*\*\* indicates  $p < 0.001$ .

338

339 **Supplementary Figure 3. Airways from the *BCL11A<sup>ovx</sup>* mice demonstrate**  
340 **proliferative preneoplastic lesions**

341 **(a)** Immunohistochemistry for BCL11A, Ki67 and Cc10 expression in control vs  
342 *BCL11A<sup>ovx</sup>* airways. BCL11A panel, arrows indicating positive staining especially in  
343 preneoplastic lesions. Ki67 panel, arrows indicating positive staining. **(b)** Sox2, Trp63  
344 and Krt5 expression in control vs *BCL11A<sup>ovx</sup>* airways. Scale bar indicates 50  $\mu\text{m}$ .

345

346 **Supplementary Figure 4. Organoids from *BCL11A<sup>ovx</sup>* basal cells exhibit increase in**  
347 **squamous markers**

348 **(a)** RNA-Seq data analysed from Weeden et al <sup>21</sup> indicating that in human samples  
349 FACS fraction labelled as proximal BCs has approximately 400 fold increase in human  
350 *BCL11A* levels in comparison to other epithelial fractions. **(b)** RNA-Seq data from the  
351 same dataset indicating that mouse *Bcl11a* is approximately 500-1000 fold higher in  
352 basal fractions compared to other epithelial subtypes. **(c, d and e)** Quantification of  
353 organoids in vehicle vs tamoxifen treated **(c)** *BCL11A<sup>ovx</sup>*, **(d)** *BCL11A<sup>cko</sup>* and **(e)** WT  
354 organoids.

355

356 **Supplementary Figure 5. Organoids from the *BCL11A<sup>ovx</sup>* basal cells display an**  
357 **abnormal proliferative phenotype**

358 Vehicle and tamoxifen treated BCL11A<sup>ovx</sup> organoids stained with H&E, GFP (which is  
359 also expressed if the LSL is efficiently excised), Bcl11a and Ki67. Nuclei stained by  
360 DAPI illustrated in blue. Arrows indicate positive staining. Scale bar indicates 50µm.

361

362 **Supplementary Figure 6. BCL11A overexpression inhibits organoid luminal**  
363 **differentiation**

364 Vehicle and tamoxifen treated BCL11A<sup>ovx</sup> organoids stained with Sox2, Krt5, Trp63  
365 and Krt8. Nuclei stained by DAPI illustrated in blue. Arrows indicate positive staining.  
366 Scale bar indicates 50 µm.

367

368 **Supplementary Figure 7. SOX2 KD affects LUSC cell lines tumorigenicity**

369 **(a and b)** Graph showing *SOX2* expression in *SOX2-KD* LK2 (a) and H520 (b) cells. **(c**  
370 **and d)** Graph showing decrease in colony numbers in *SOX2-KD* LK2 (c) and H520 (d)  
371 cells. **(e and f)** Graph depicting reduction in tumour size observed when *SOX2* shRNA1  
372 or shRNA2 transfected LK2 (e) and H520 (f) cells are injected subcutaneously into  
373 mice compared with control. Five (LK2) and four (H520) mice per cell line were  
374 monitored for 15 days after which tumours were removed and measured. On the right  
375 are images showing actual tumours measured. Data presented as mean ± s.d. One way  
376 ANNOVA with post Dunnett test performed, \* indicates p<0.05 and \*\* p<0.005 and  
377 \*\*\* indicates p<0.001. **(g and h)** *KRT5* expression is reduced in LK2 (g) and H520 (h)  
378 *BCL11A*-KD cells. **(i and j)** *P63* expression is reduced in LK2 (i) and H520 (j)  
379 *BCL11A*-KD cells.

380

381 **Supplementary Figure 8. BCL11A is required for SOX2 mediated LUSC**  
382 **phenotype**



383 **(a and b)** Graph showing *BCL11A* **(a)** and *SOX2* **(b)** expression in BCL11A rescue in  
384 *SOX2*-KD cells. Dox inducible *BCL11A* overexpression vector was transfected into  
385 control and *SOX2* shRNA1 LK2 cells and Dox treatment was performed for 48 hours.  
386 **(c)** Images from 3D matrigel experiment showing reduction in colony numbers after  
387 *SOX2*-KD and partial rescue after BCL11A overexpression.

388 **Supplementary Figure 9. BCL11A and SOX2 bind to common loci on the genome**

389 **(a-h)** ChIP-qPCR showing enrichment for the indicated primers on *SETD8*, *SKIL*, *TBX2*  
390 and *BCL11A* regions after Chip pull down using anti-BCL11A or anti-SOX2 antibodies  
391 in LK2 and H520 cell lines. **(i-l)** Schematic of amplicon locations for ChIP-qPCR  
392 validations performed in this study. Arrows represent location of primers used. Error  
393 bars represent mean  $\pm$  s.e.m.; n = 3 (technical replicates).

394

395 **Supplementary Figure 10. BCL11A and SOX2 co-regulate transcriptional**  
396 **regulators**

397 **(a and b)** Co-Immunoprecipitation of endogenous BCL11A and SOX2 proteins in LK2  
398 **(a)** and H520 **(b)** cell lines. **(c, d, g, h)** *SKIL* gene expression in *BCL11A*-KD or *SOX*-  
399 KD LK2 and H520 cell lines. **(e, f, i, j)** *TBX2* gene expression in *BCL11A*-KD or *SOX2*-  
400 KD LK2 and H520 cell lines. Data presented as mean  $\pm$  s.d. (n=3). One way ANOVA  
401 with post Dunnett test performed, \* indicates  $p < 0.05$  and \*\*  $p < 0.005$  and \*\*\* indicates  
402  $p < 0.001$ .

403

404 **Supplementary Figure 11. SETD8 correlates with BCL11A and SOX2 in LUSC**  
405 **patients**

406 **(a)** Scatter plot showing *SETD8* and *BCL11A* expression in TCGA patient tumour  
407 samples. **(b)** Scatter plot showing *SETD8* and *SOX2* expression in TCGA patient  
408 tumour samples.

409

410

411

## 412 **Materials and Methods**

### 413 **Mouse models**

414 All mice used in this study were maintained at the Sanger Institute or the University of  
415 Cambridge. Housing and breeding of mice and experimental procedures were  
416 performed according to the UK 1986 Animals Scientific Procedure Act and local  
417 institute ethics committee regulations. The *BCL11A<sup>ox</sup>* allele was generated following a  
418 strategy previously described<sup>36</sup>. Briefly, the *ROSA26* allele was targeted with a  
419 construct containing human *BCL11A* cDNA preceded by a loxP flanked STOP cassette  
420 and marked *eGFP* under the control of an internal ribosomal entry site (IRES)  
421 downstream of the inserted cDNA and transgene transcription is controlled by the *CAG*  
422 promoter. The generation of the *Bcl11a<sup>cko</sup>* mice was described previously<sup>16</sup>. All mice  
423 were 8–12 weeks of age at the time of experiments, and at least 3 mice per cohort were  
424 used in each experiment. The primers used for genotyping are listed in Supplementary  
425 Table 4.

426

### 427 **Mouse Tracheal Isolation and tracheosphere culture**

428 Tracheae were incubated in 50 U/ml dispase (Sigma) for 45 minutes at 37°C. 10 ml PBS  
429 was injected through each trachea using a 25G 5/8" needle to flush out sheets of  
430 epithelial cells. Cells were incubated in 0.25% trypsin for 5 minutes at 37°C. Cells were  
431 stained in PBS + 10%FBS + 1:100 anti-EpCAM PE-Cy7 (Biolegend) + 1:5000 DAPI  
432 on ice for 20 minutes. Live EpCAM<sup>+ve</sup> cells were isolated using a MoFlo sorter. 2500  
433 cells were plated in 100µl 1:1 mix of Mouse Tracheal Epithelial Cell (MTEC)/Plus  
434 media which is DMEM-Ham's F-12 (1:1 vol/vol), 15 mM HEPES, 3.6 mM sodium  
435 bicarbonate, 4 mM L-glutamine, 100 U/ml penicillin, 100 µg/ml streptomycin, and 0.25  
436 µg/ml fungizone; supplemented with 10 µg/ml insulin, 5 µg/ml transferrin, 0.1 µg/ml

437 cholera toxin, 25 ng/ml epidermal growth factor (Becton-Dickinson, Bedford, MA), 30  
438  $\mu\text{g/ml}$  bovine pituitary extract, 5% FBS, and freshly added 0.01  $\mu\text{M}$  retinoic acid<sup>37</sup> and  
439 growth factor reduced-Matrigel (Corning) per 24-well insert, in duplicate with 500 nM  
440 4-hydroxy tamoxifen (Sigma) or ethanol (vehicle) for each mouse, and cultured for 15  
441 days.

442

#### 443 **Cell lines**

444 LK2, NCI-H520, NCI-H157, LUDLU1, SW900, NCI-H1792, NCI-H522, NCI-HCC78,  
445 A549, NCI-H1563, NCI-H1975 were all maintained in RPMI 1640 (Gibco), 10% FCS  
446 and 1% Penicillin/streptomycin in a 37°C incubator with 5% CO<sub>2</sub>.

447

#### 448 **ShRNA mediated knockdown**

449 *BCL11A* shRNA sequences were obtained from TRC consortium (TRCN0000033449  
450 and TRCN0000033453) and cloned into a piggyBac transposon vector (PB-H1-shRNA-  
451 GFP) as describe previously<sup>38</sup>. Sox2 shRNA sequences (TRCN0000355694 and  
452 TRCN0000257314) were also cloned as above. H520, H1792 and LK2 cells were  
453 transfected with 4.0  $\mu\text{g}$  of respective vector using Lipofectamine 3000 or Lipofectamine  
454 LTX (Invitrogen). Cells were treated with G418 (400  $\mu\text{g/ml}$ ) (Gibco) for 5 days after  
455 which GFP<sup>+ve</sup> cell were sorted using a Sony SH800 cell sorter (Sony, Tokyo, Japan) and  
456 cultured.

457

#### 458 **Transfection and 3D colony assays**

459 The control or the *BCL11A* overexpression piggybac vectors were delivered into  
460 NSCLC cells using Lipofectamine LTX (Invitrogen). Transfected cells were maintained  
461 for 48 hours and then cultured in puromycin (1 $\mu\text{g/ml}$ ). To induce BCL11A expression

462 in LK2 *SOX2-KD* cells, doxycycline (Clonotech) was used at a final concentration of (1  
463  $\mu\text{g/ml}$ ). 3D colony assays were performed by suspending 500 cells in matrigel (BD  
464 Biosciences) and seeding this cell-matrigel suspension onto a 6-well plate. The plate  
465 was then incubated for 15 minutes in  $37^{\circ}\text{C}/5\% \text{CO}_2$  to allow hardening of suspension.  
466 Growth media was added to the well and changed every 2-3 days for 20 days. All  
467 experiments were performed in triplicates.

468

#### 469 **Preparation of RNA**

470 RNA was extracted using the RNeasy mini kit (Qiagen). Cell cultures in T25 flasks  
471 were first washed with cold PBS, and  $350 \mu\text{l}$  of RLT was added. Cells were scraped,  
472 passed through a 20G syringe five times and RNA was extracted using the RNeasy mini  
473 kit (Qiagen) according to manufacturer instructions. DNA was degraded by adding 20U  
474 Rnase-free DnaseI (Roche) for 30 minutes at room temperature. DnaseI treatment was  
475 performed on columns.

476

#### 477 **Preparation of cDNA and qRT-PCR**

478  $1 \mu\text{g}$  of total RNA was diluted to a final volume of  $11 \mu\text{l}$ .  $2 \mu\text{l}$  of random primers  
479 (Promega) were added after which the mixture was incubated at  $65^{\circ}\text{C}$  for 5 mins. A  
480 master mix containing Transcriptor Reverse Transcriptase (Roche), Reverse  
481 Transcriptase buffer, 2 mM dNTP mix and RNasin Ribonuclease Inhibitors (Promega).  
482 This mixture was incubated at  $25^{\circ}\text{C}$  for 10 minutes, then  $42^{\circ}\text{C}$  for 40 minutes and  
483 finally  $70^{\circ}\text{C}$  for 10 minutes. The resulting cDNA was then diluted 1:2.5 in  $\text{H}_2\text{O}$  for  
484 subsequent use. qPCR was performed using a Step-One Plus Real-Time PCR System  
485 (Thermofisher Scientific). Either Taqman (ThermoFisher Scientific) probes with GoTaq  
486 Real Time qPCR Master Mix (Promega) or primers (Sigma) with PowerUp SYBR

487 Green Master Mix (ThermoFisher Scientific) were used. All probe and primer details  
488 can be found in Supplementary Table 5 and 6. The enrichment was normalised with  
489 control mRNA levels of GAPDH and relative mRNA levels were calculated using the  
490  $\Delta\Delta\text{Ct}$  method comparing to control group.

491

#### 492 **Western Blot**

493 Cells were lysed using RIPA (Cell signalling) and protease inhibitors (Roche) as per  
494 manufacturer instructions. Total protein was measured using the bicinchoninic acid  
495 (BCA) method (Pierce Biotechnology). In total, 50 mg cell lysate was separated using  
496 7.5% SDS-PAGE gels and transferred to PVDF membranes by electro-blotting.  
497 Membranes were blocked in 5% (w/v) milk in Tris-buffered saline containing 0.05%  
498 Tween-20 (TBST). Blots were then incubated at 4°C overnight with primary antibodies  
499 as indicated, washed in TBST and subsequently probed with secondary antibodies for  
500 1h at room temperature. ECL solution was then added to the membrane and analysed.  
501 Antibodies used were, anti-BCL11A (ab191401, Abcam, 1:3000), anti-SOX2 (ab97959,  
502 Abcam, 1:2000) and anti-TUBULIN (ab7291, Abcam, 1:10000).

503

#### 504 **Co-Immunoprecipitation**

505 Cells were lysed using RIPA (Cell signalling) and protease inhibitors (Roche) as per the  
506 manufacturer's instructions. Total protein was measured using the BCA method as  
507 above (Pierce Biotechnology). Briefly, 500µg cell lysates were pre-cleared for 3h at 4°C  
508 to remove nonspecific binding. Then, the pre-cleared lysates were incubated with anti-  
509 BCL11A (Bethyl, A300-382A) and SOX2 (R&D Systems, AF2018) or control IgG at  
510 4°C overnight. Next day 50µl of Dynabeads Protein G (Thermo Fisher Scientific) were

511 added to each sample. After 3h, the complex was washed three times with RIPA buffer,  
512 and then analysed by Western Blot performed as described above.

### 513 **Histology, Immunohistochemistry and Immunofluorescence**

514 Cultured organoid were fixed with 4% paraformaldehyde in PBS for 4h at room  
515 temperature. After rinsing with PBS, fixed colonies were immobilised with Histogel  
516 (Thermo Scientific) for paraffin embedding. 5µm sections of lung tissues or embedded  
517 colonies were stained with haematoxylin and eosin (H&E) and immunostained with  
518 antibodies for BCL11A (IHC - ab191402, Abcam,1:1000), SOX2 (IHC – ab97959,  
519 1:1000; IF – 14-9811-82, eBioscience, 1:200), Ki67 (IHC - MA5-14520, Thermo  
520 Scientific, 1:1000; IF - ab16667, Abcam, 1:300), GFP (IF - ab13970 Abcam, 1:1000),  
521 Keratin 8 (IF - TROMA-I, DSHB, 1:100), Keratin 5 (IHC – ab52635, Abcam, 1:1000;  
522 IF - 905501, Biolegend, 1:1000), P63 (IHC – ab735, Abcam, 1:200; IF – ab735, Abcam,  
523 1:200), CCP10 (IHC – sc25555, Santa Cruz Biotechnology, 1:500). IHC secondary  
524 staining involved an HRP-conjugated donkey anti-rabbit or donkey anti-mouse  
525 secondary (1:250, Thermo Scientific) and were detected using DAB reagent (Thermo  
526 Scientific). IF secondary staining involved goat anti-chicken 488, goat anti-rabbit 647,  
527 goat anti-rat 647, goat anti-rabbit 488 and goat anti-mouse 647 (1:2000, Invitrogen).  
528 Nuclear stain was detected using Haematoxylin (IHC) or ProLong Gold Antifade  
529 Mountant DAPI (Thermofisher, P36941) (IF). IHC images were acquired using a Zeiss  
530 Axioplan 2 microscope and IF images were acquired using a Leica TCS SP5 confocal  
531 microscope and analysed on Image J.

532

### 533 **Xenograft tumour assays**

534 One million H520 and LK2 cells were suspended in 25% matrigel (BD Biosciences)  
535 and HBSS. This mixture was subcutaneously injected in 6-12 week old NSG mice. To

536 induce BCL11A overexpression in *SOX2-KD* xenografts, mice were fed doxycycline  
537 pellets (Envigo, TD.01306, 625mg/kg). Mice were culled as specified in figure legends  
538 and resulting tumours were analysed.

539

#### 540 **ChIP-Seq and ChIP-qPCR**

541 ChIP-Seq experiments were performed as described<sup>39</sup>. Antibodies used were BCL11A  
542 (Bethyl, A300-382A) and SOX2 (R&D Systems, AF2018). Briefly 2 x 15cm plates per  
543 cell line were formaldehyde crosslinked, nuclear fraction was isolated and chromatin  
544 sonicated using Bioruptor Pico (Diagenode). IP was performed using 100µl of  
545 Dynabeads Protein G (Thermo Fisher Scientific) and 10µg of antibody. The samples  
546 were then reverse crosslinked and DNA was eluted using Qiagen MinElute column.  
547 Sample was then processed either for sequencing or qPCR. Primers used for qPCR are  
548 listed in Supplementary Table 7.

549

#### 550 **Drug assays**

551 SETD8 inhibitor NSC663284 (Cayman Chemical Company, 13303) was suspended  
552 using DMSO in 10mM stock concentration. Cisplatin (LKT Laboratories, C3374) was  
553 suspended in 154mM NaCl at a 3mM stock concentration. Cells were cultured as above  
554 and seeded at 1000 cells per 96-well plate and left to recover for 24h. The edges of the  
555 96-well plate were avoided to ensure accuracy in measurement. For NSC663284, an  
556 initial dilution of 1:100 from stock was performed in RPMI media for the first  
557 concentration of 10<sup>-4</sup>M. Half log dilutions were performed in RPMI media reaching 10<sup>-</sup>  
558 6M and after which full log dilutions were performed reaching 10<sup>-10</sup>M. For cisplatin,  
559 initial dilution in RPMI media were made to achieve 100µM and 75µM. The 100µM  
560 solution was used to make the following solutions 50µM, 25µM, 12.5µM, 6.75µM,



561 3.75 $\mu$ M, 1.5 $\mu$ M and 0.5 $\mu$ M. Cells were treated with vehicle for 48h after which the  
562 above doses of cisplatin were added. For cisplatin + NSC663284 experiment the  
563 NSC663284 IC50 concentration for each cell line was calculated and added initially for  
564 48hrs and then added again along with the cisplatin dilution series as above for 24hrs.  
565 Data analysis for drug inhibitor assays was performed in GraphPad Prism 7.02 (San  
566 Diego, CA). Data were fitted to obtain concentration-response curves using the three-  
567 parameter logistic equation (for pIC50 values). Emax was constrained to 100% while  
568 the basal (Emin) parameter was constrained to 20%. Statistical differences were analyzed  
569 using one-way ANOVA or Student's t test as appropriate with post hoc Dunnett's  
570 multiple comparisons, and  $p < 0.05$  was considered significant.

571

#### 572 **BCL11A IHC on patient tumours**

573 TMAs contained LUAD (n=99) and LUSC (n=120) cases of archival primary  
574 pulmonary tumours collected under East Midlands NRES REC approved project (ref.  
575 14/EM/1159). 1mm (n=3) cores are present per case which were initially scored  
576 (average nuclear staining intensity) as 0=neg, 1=weak, 2=moderate, 3=strong. A median  
577 score was calculated for each case and re classified as 0=neg, 1=moderate, 2=strong. All  
578 tissues and data are anonymised to the research team. IHC was performed using  
579 BCL11A antibody (ab19487, 1:200) with CC1 antigen retrieval using a Ventana  
580 discovery xt. Digital images of stained TMAs were scanned with a Nanozoomer RX  
581 instrument and scored on-screen by MD.

582

#### 583 **TCGA gene expression analysis**

584 The TCGA data was accessed from the recount2 database<sup>40</sup> containing gene level count  
585 data from RNA-seq and clinical data from primary tumor samples from patients

586 diagnosed with LUAD and LUSC, respectively. EdgeR<sup>41</sup> was used to test for  
587 differential expression of transcription factors (as defined by Tfcheckpoint.org). For  
588 this, compositional differences between samples were normalized using the trimmed  
589 median of M-values method and a gene-specific dispersion was estimated for each gene.  
590 A negative binomial generalized log-linear model was fit to each gene with the  
591 covariates “plate+disease\_type” (for the LUAD versus LUSC comparison) or  
592 “patient+disease\_type” (for the tumor versus normal comparison). A log-likelihood  
593 ratio test was conducted to test whether the coefficient of the disease\_type variable is  
594 non-zero, followed by Benjamini-Hochberg adjustment of P values to account for  
595 multiple testing. Plate A277 and A278 from the LUAD dataset were removed prior to  
596 analysis as they showed a clear separation along the first component in a principal  
597 component analysis from all other LUAD samples.

598

### 599 **ChIP-Seq analysis**

600 ChIP-Seq libraries were sequenced on illumina Hiseq2000 platform at the Wellcome  
601 Sanger Institute. Each library was divided into two and sequenced on different lanes.  
602 Reads were subsequently run through a pipeline at the sequencing facility to remove  
603 adapter sequences and align to the reference genome among others. Alignment was  
604 done using mem algorithm in BWA (version 0.7.15) and human\_g1k\_v37 was used as  
605 the reference genome. Aligned and processed reads were received as compressed  
606 CRAM files. Samtools (version 1.3.1) was used to decompress the CRAM files and  
607 filter uniquely mapped reads in proper pairs. Next, reads from the two runs were  
608 combined into a single BAM file using 'merge' function in samtools. Bedtools intersect  
609 was then used to remove reads falling into blacklisted genomic regions or unplaced  
610 genomic contigs of the GRCh37 assembly before marking and removing duplicate reads

611 using MarkDuplicates function in Picard tools. Next, DownsampleSam in picard tools  
612 was used to sample ~105 million reads from each BAM file. Significantly enriched  
613 genomic regions relative to input DNA were identified using MACS2 (version  
614 2.1.1.20160309) with p-value cutoff of 1.00e-05. Heatmaps generation: Mapped read  
615 counts were calculated in a 10bp window and normalised as RPKM (Reads Per  
616 Kilobase per Million mapped reads) using bamCoverage module from deeptools  
617 (version 2.5.1)<sup>42</sup>. This coverage file was used to compute score matrix  $\pm$ 1kb around  
618 peak summits using computeMatrix reference-point module (from deeptools version  
619 2.5.1)<sup>42</sup>. Heatmaps of binding profiles around peak summits were then generated using  
620 plotHeatmap module in deeptools (version 2.5.1)<sup>42</sup>. Number of overlapping peaks  
621 between BCL11A and SOX2 and nearest downstream genes to peaks were determined  
622 using ODS and NDG utilities respectively in PeakAnnotator (version 1.4). For  
623 annotating nearest downstream genes, Homo sapiens GRCh37 (release 64) from  
624 ensembl was used.

625

#### 626 **Author contribution**

627 K.L. designed and performed the majority of the experiments and analysed most of the  
628 data. F.H. analysed the CHIP-seq data. E.Z. performed the CHIP-qPCR experiments.  
629 K.B. analysed the TCGA data. S.P. performed some cell line work. R.U assisted with  
630 the BCL11A rescue experiment. M.F.S performed Co-IP experiment. L.B. measured the  
631 airway thickness. L.S.C. characterised the lung pathology of adenovirus mice. G.L  
632 designed and analysed the drug assays. J.K and J.H.L performed the tracheosphere  
633 organoid experiment. L.L.C and F.M performed the mouse tissue IHC. M.D and J.LQ  
634 performed and analysed the BCL11A IHC on patient tumours. P.L. assisted with the  
635 NGS sequencing and provided the *Bcl11a*<sup>cko</sup> mice. Adenovirus Cre administration was

636 performed under G.E. supervision. D.C. generated the *BCL11A*<sup>ovx</sup> mice. W.T.K  
637 conceptualised and supervised the study. K.L and W.T.K wrote the manuscript.

### 638 **Acknowledgements**

639 We would like to thank the staff at Sanger Institute, Research Service Facility (RSF) for  
640 their assistance. We would like to thank Dr. Catherine Wilson and Dr. Deborah  
641 Burkhart (Department of Biochemistry, Cambridge) for her help with the Adenovirus  
642 experiment. We would like to thank Dr. Emma Rawlins for helpful discussions and  
643 comments. M.F.S was funded by Associazione Italiana per la Ricerca sul Cancro  
644 (AIRC, 16719/2015). W.T.K is funded by a CRUK career establishment award  
645 (C47525/A17348), University of Cambridge and Magdalene College, Cambridge. We  
646 would also like to thank the Isaac Newton Trust for funding. G.L. was supported by the  
647 BBSRC (Grant BB/M00015X/2).

648

649

## 650 References

- 651 1. Siegel, R.L., Miller, K.D. & Jemal, A. Cancer statistics, 2017. *CA: A Cancer Journal for*  
652 *Clinicians* **67**, 7-30 (2017).
- 653 2. Chen, Z., Fillmore, C.M., Hammerman, P.S., Kim, C.F. & Wong, K.K. Non-small-cell lung  
654 cancers: a heterogeneous set of diseases. *Nature reviews. Cancer* **14**, 535-546 (2014).
- 655 3. Jemal, A., *et al.* Global cancer statistics. *CA Cancer Journal for Clinicians* **61**, 69-90  
656 (2011).
- 657 4. Pillai, R.N. & Ramalingam, S.S. Necitumumab: a new therapeutic option for squamous  
658 cell lung cancer? *Translational Lung Cancer Research* **3**, 382-383 (2014).
- 659 5. Kwon, M.-c. & Berns, A. Mouse models for lung cancer. *Molecular Oncology* **7**, 165-177  
660 (2013).
- 661 6. The Cancer Genome Atlas Research, N. Comprehensive molecular profiling of lung  
662 adenocarcinoma. *Nature* **511**, 543-550 (2014).
- 663 7. McCaughan, F., *et al.* Progressive 3q Amplification Consistently Targets SOX2 in  
664 Preinvasive Squamous Lung Cancer. *American Journal of Respiratory and Critical Care*  
665 *Medicine* **182**, 83-91 (2010).
- 666 8. Bass, A.J., *et al.* SOX2 is an amplified lineage-survival oncogene in lung and esophageal  
667 squamous cell carcinomas. *Nat Genet* **41**, 1238-1242 (2009).
- 668 9. Hussenet, T., *et al.* SOX2 Is an Oncogene Activated by Recurrent 3q26.3 Amplifications  
669 in Human Lung Squamous Cell Carcinomas. *PLOS ONE* **5**, e8960 (2010).
- 670 10. Lu, Y., *et al.* Evidence That SOX2 Overexpression Is Oncogenic in the Lung. *PLOS ONE* **5**,  
671 e11022 (2010).
- 672 11. Network, T.C.G.A.R. Comprehensive genomic characterization of squamous cell lung  
673 cancers. *Nature* **489**, 519-525 (2012).
- 674 12. Campbell, J.D., *et al.* Distinct patterns of somatic genome alterations in lung  
675 adenocarcinomas and squamous cell carcinomas. *Nat Genet* **48**, 607-616 (2016).
- 676 13. Khaled, W.T., *et al.* BCL11A is a triple-negative breast cancer gene with critical  
677 functions in stem and progenitor cells. *Nat Commun* **6**(2015).
- 678 14. Tao, H., *et al.* BCL11A expression in acute myeloid leukemia. *Leukemia Research* **41**,  
679 71-75 (2016).
- 680 15. Weniger, M.A., *et al.* Gains of the proto-oncogene BCL11A and nuclear accumulation  
681 of BCL11AXL protein are frequent in primary mediastinal B-cell lymphoma. *Leukemia*  
682 **20**, 1880-1882 (2006).
- 683 16. Yu, Y., *et al.* Bcl11a is essential for lymphoid development and negatively regulates  
684 p53. *The Journal of Experimental Medicine* **209**, 2467 (2012).
- 685 17. Jamal-Hanjani, M., *et al.* Tracking the Evolution of Non-Small-Cell Lung Cancer. *New*  
686 *England Journal of Medicine* **376**, 2109-2121 (2017).
- 687 18. Zhang, N., *et al.* The BCL11A-XL expression predicts relapse in squamous cell carcinoma  
688 and large cell carcinoma. *Journal of Thoracic Disease* **7**, 1630-1636 (2015).
- 689 19. Idowu, M.O. & Powers, C.N. Lung cancer cytology: potential pitfalls and mimics - a  
690 review. *International Journal of Clinical and Experimental Pathology* **3**, 367-385 (2010).
- 691 20. Rock, J.R., *et al.* Basal cells as stem cells of the mouse trachea and human airway  
692 epithelium. *Proceedings of the National Academy of Sciences* **106**, 12771-12775  
693 (2009).
- 694 21. Weeden, C.E., *et al.* Lung Basal Stem Cells Rapidly Repair DNA Damage Using the Error-  
695 Prone Nonhomologous End-Joining Pathway. *PLOS Biology* **15**, e2000731 (2017).
- 696 22. Nishioka, K., *et al.* PR-Set7 Is a Nucleosome-Specific Methyltransferase that Modifies  
697 Lysine 20 of Histone H4 and Is Associated with Silent Chromatin. *Molecular Cell* **9**,  
698 1201-1213 (2002).
- 699 23. Wu, S. & Rice, J.C. A new regulator of the cell cycle. *Cell Cycle* **10**, 68-72 (2011).

- 700 24. Tecalco-Cruz, A.C., *et al.* Transforming Growth Factor- $\beta$ /SMAD Target Gene SKIL Is  
701 Negatively Regulated by the Transcriptional Cofactor Complex SNON-SMAD4. *Journal*  
702 *of Biological Chemistry* **287**, 26764-26776 (2012).
- 703 25. Prince, S., Carreira, S., Vance, K.W., Abrahams, A. & Goding, C.R. Tbx2 Directly  
704 Represses the Expression of the p21 (WAF1) Cyclin-Dependent Kinase Inhibitor. *Cancer*  
705 *Research* **64**, 1669 (2004).
- 706 26. Lu, X., *et al.* The effect of H3K79 dimethylation and H4K20 trimethylation on  
707 nucleosome and chromatin structure. *Nat Struct Mol Biol* **15**, 1122-1124 (2008).
- 708 27. Driskell, I., *et al.* The histone methyltransferase Setd8 acts in concert with c-Myc and is  
709 required to maintain skin. *The EMBO Journal* **31**, 616-629 (2012).
- 710 28. Takawa, M., *et al.* Histone Lysine Methyltransferase SETD8 Promotes Carcinogenesis  
711 by Dereulating PCNA Expression. *Cancer Research* **72**, 3217 (2012).
- 712 29. Shi, X., *et al.* Modulation of p53 Function by SET8-Mediated Methylation at Lysine 382.  
713 *Molecular Cell* **27**, 636-646 (2007).
- 714 30. Yang, F., *et al.* SET8 promotes epithelial–mesenchymal transition and confers TWIST  
715 dual transcriptional activities. *The EMBO Journal* **31**, 110 (2011).
- 716 31. Blum, G., *et al.* Small-Molecule Inhibitors of SETD8 with Cellular Activity. *ACS Chemical*  
717 *Biology* **9**, 2471-2478 (2014).
- 718 32. Milite, C., *et al.* The emerging role of lysine methyltransferase SETD8 in human  
719 diseases. *Clinical Epigenetics* **8**, 102 (2016).
- 720 33. Pu, L., Amoscato, A.A., Bier, M.E. & Lazo, J.S. Dual G1 and G2 Phase Inhibition by a  
721 Novel, Selective Cdc25 Inhibitor 7-Chloro-6-(2-morpholin-4-ylethylamino)- quinoline-  
722 5,8-dione. *Journal of Biological Chemistry* **277**, 46877-46885 (2002).
- 723 34. Brisson, M., *et al.* Redox Regulation of Cdc25B by Cell-Active Quinolinediones.  
724 *Molecular Pharmacology* **68**, 1810 (2005).
- 725 35. Lazo, J.S., *et al.* Discovery and Biological Evaluation of a New Family of Potent  
726 Inhibitors of the Dual Specificity Protein Phosphatase Cdc25. *Journal of Medicinal*  
727 *Chemistry* **44**, 4042-4049 (2001).
- 728 36. Sasaki, Y., *et al.* Canonical NF- $\kappa$ B Activity, Dispensable for B Cell Development, Replaces  
729 BAFF-Receptor Signals and Promotes B Cell Proliferation upon Activation. *Immunity* **24**,  
730 729-739 (2006).
- 731 37. You, Y., Richer, E.J., Huang, T. & Brody, S.L. Growth and differentiation of mouse  
732 tracheal epithelial cells: selection of a proliferative population. *American Journal of*  
733 *Physiology - Lung Cellular and Molecular Physiology* **283**, L1315 (2002).
- 734 38. Khaled, W.T., *et al.* BCL11A is a triple-negative breast cancer gene with critical  
735 functions in stem and progenitor cells. **6**, 5987 (2015).
- 736 39. Schmidt, D., *et al.* ChIP-seq: Using high-throughput sequencing to discover protein–  
737 DNA interactions. *Methods* **48**, 240-248 (2009).
- 738 40. Collado-Torres, L., *et al.* Reproducible RNA-seq analysis using recount2. *Nat Biotech* **35**,  
739 319-321 (2017).
- 740 41. Robinson, M.D., McCarthy, D.J. & Smyth, G.K. edgeR: a Bioconductor package for  
741 differential expression analysis of digital gene expression data. *Bioinformatics* **26**, 139-  
742 140 (2010).
- 743 42. Ramírez, F., Dündar, F., Diehl, S., Grüning, B.A. & Manke, T. deepTools: a flexible  
744 platform for exploring deep-sequencing data. *Nucleic Acids Research* **42**, W187-W191  
745 (2014).

746



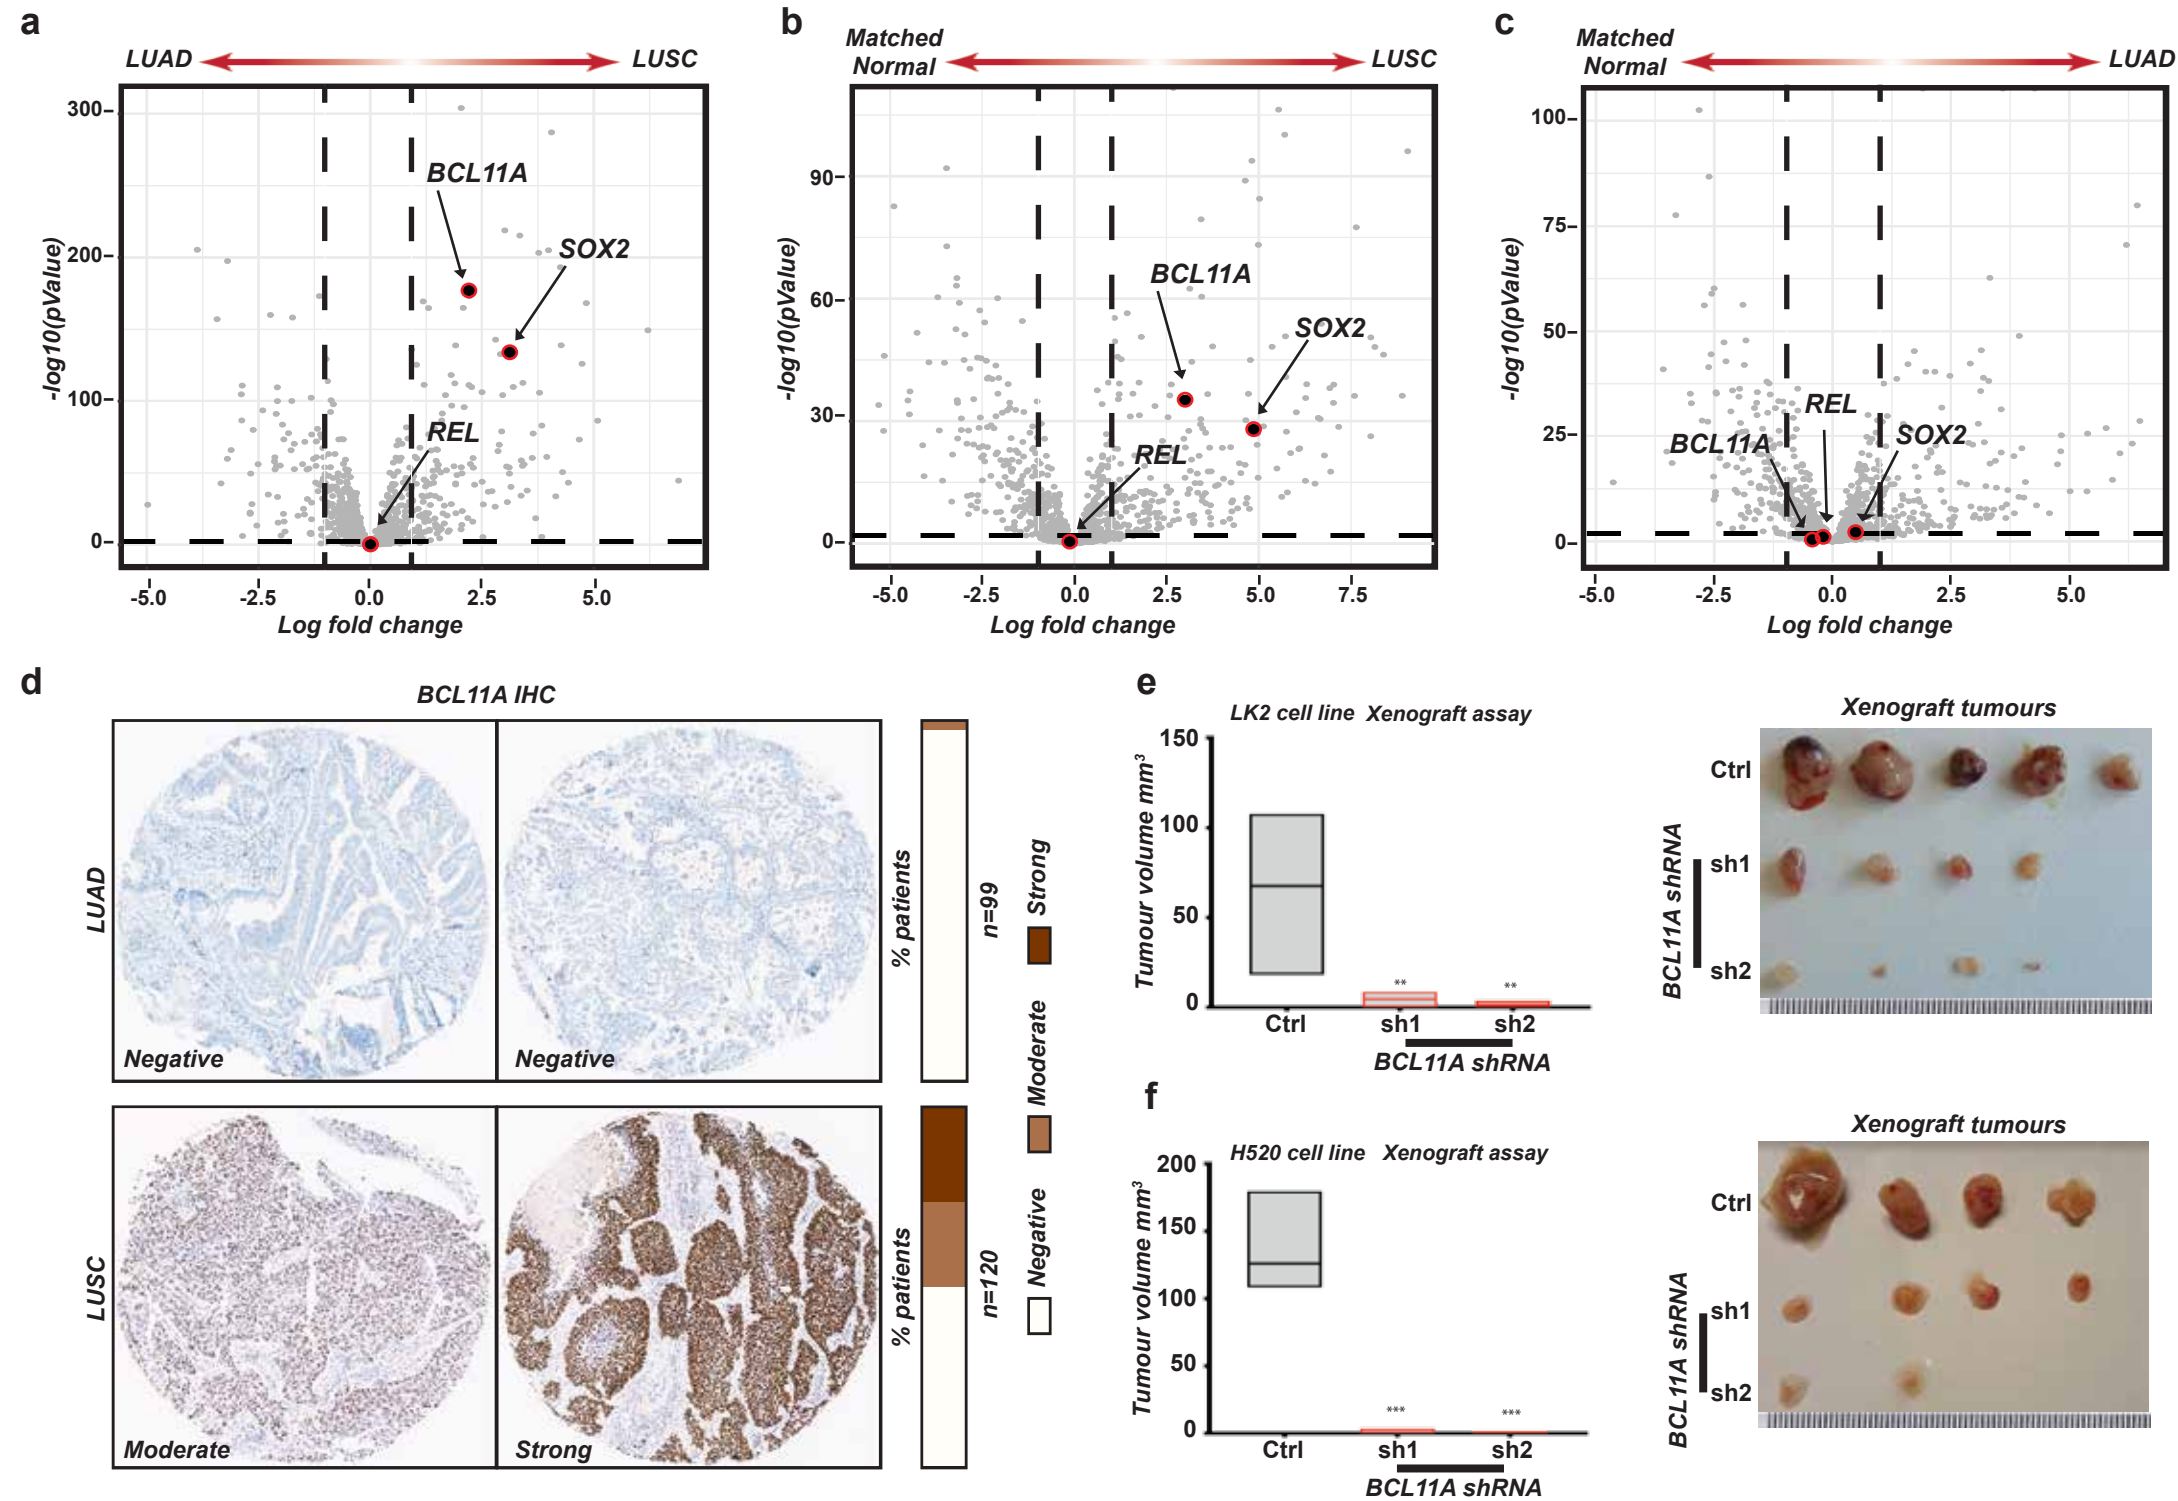





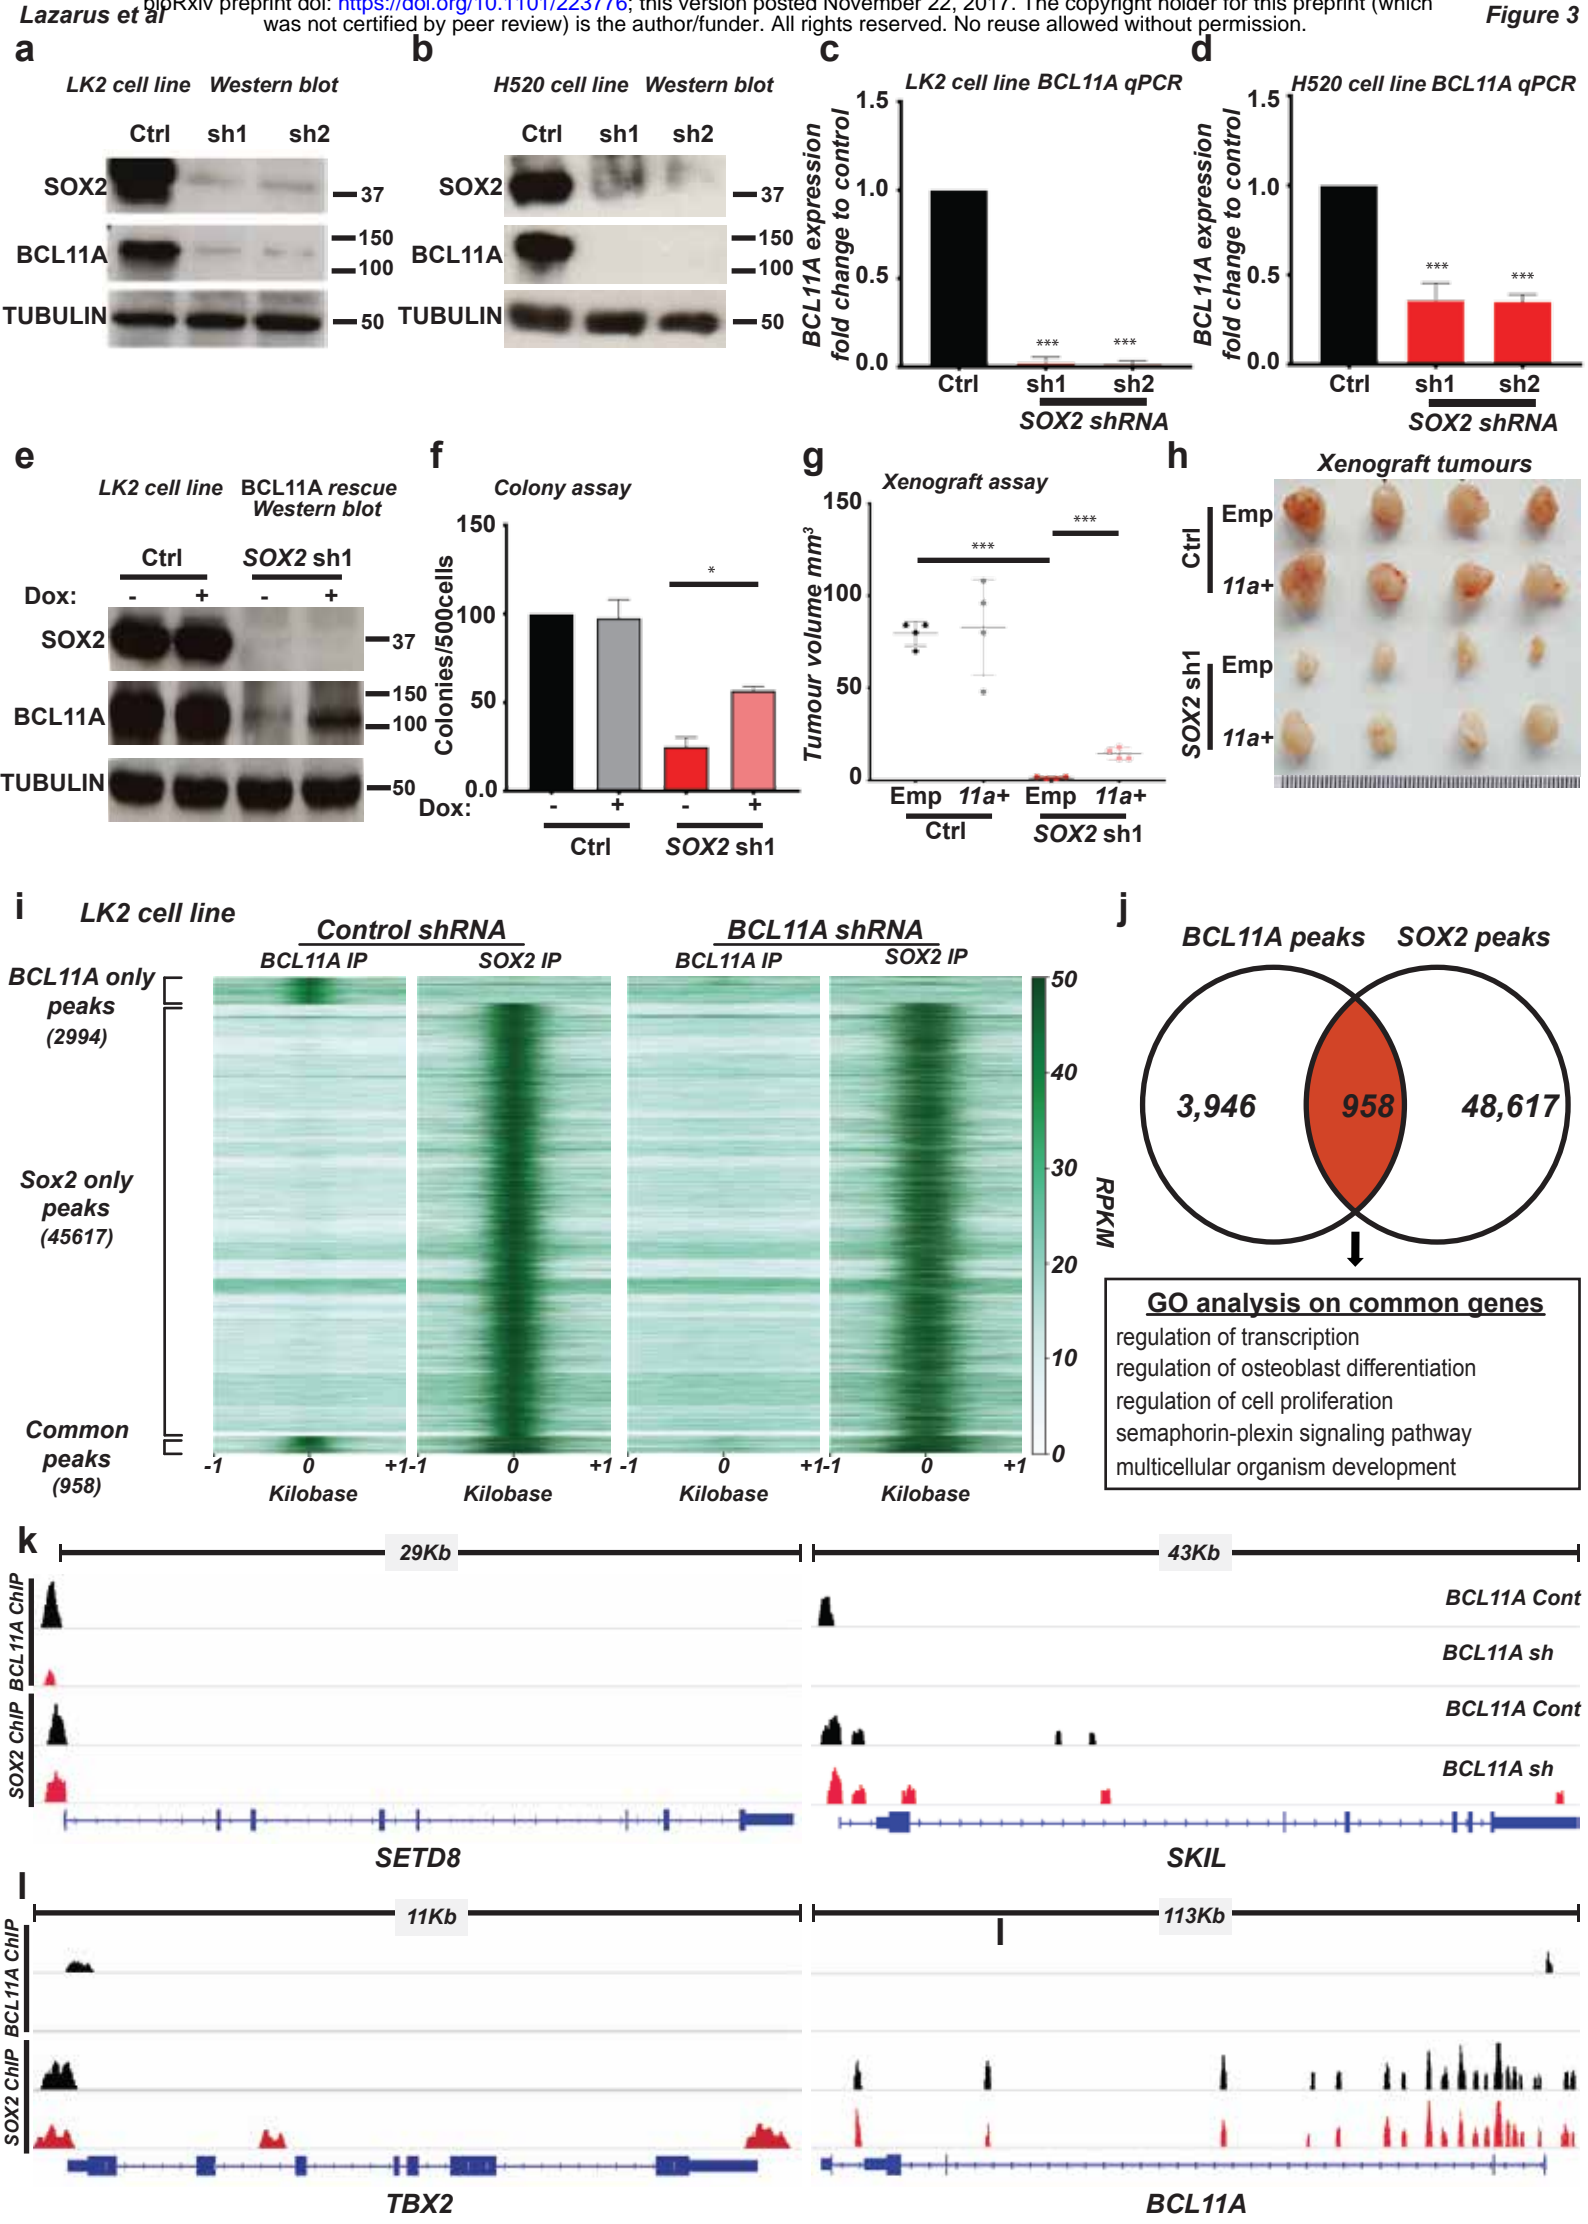

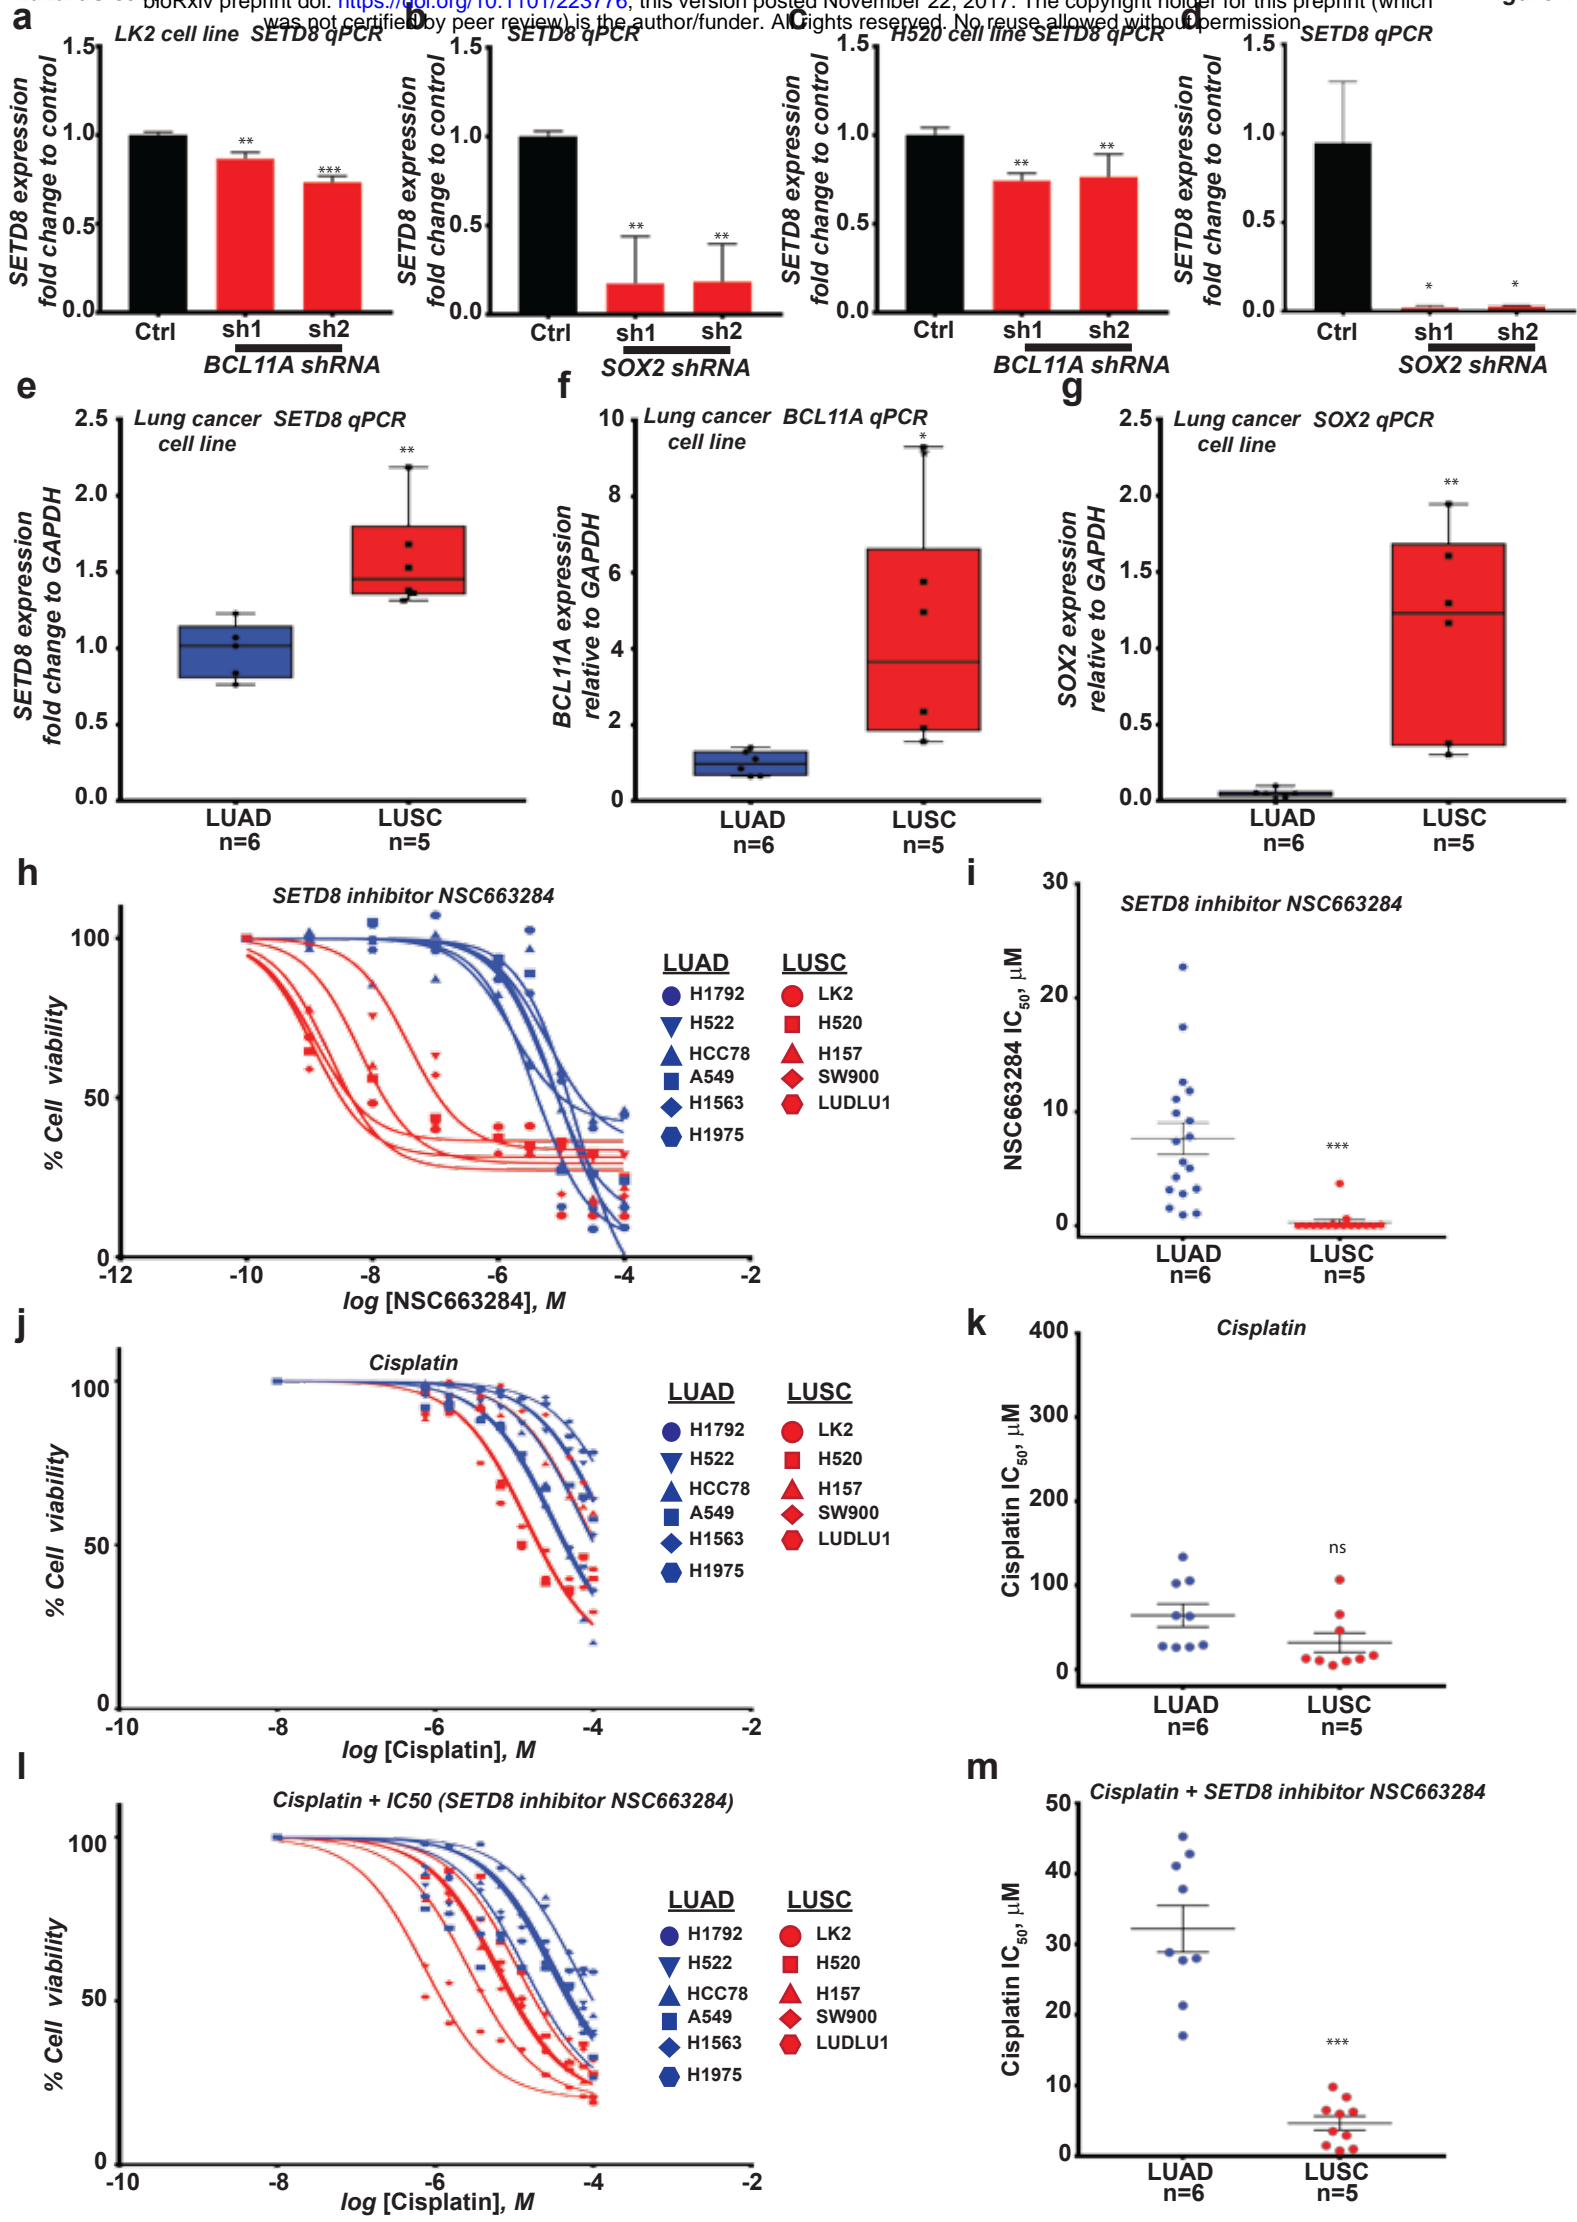

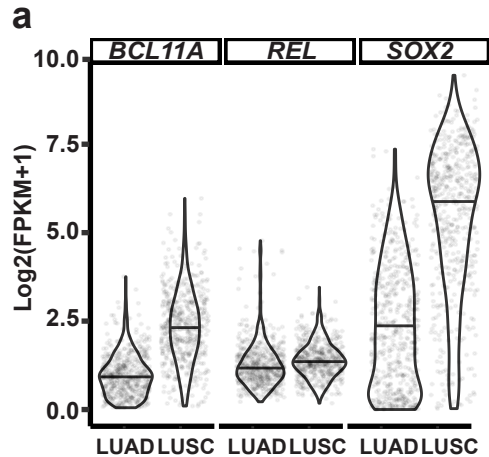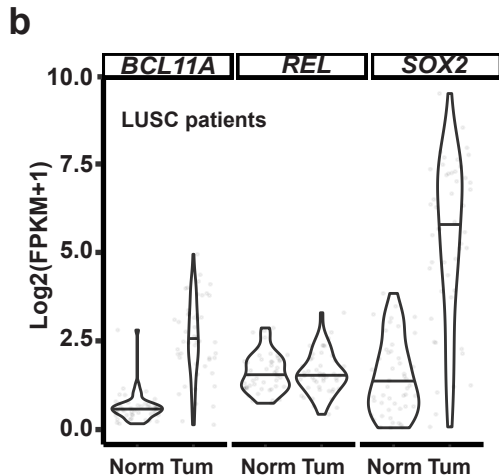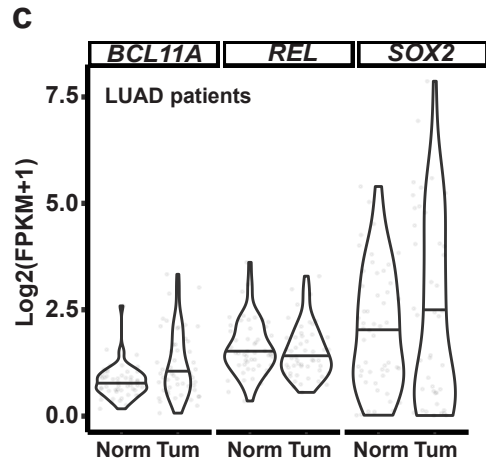

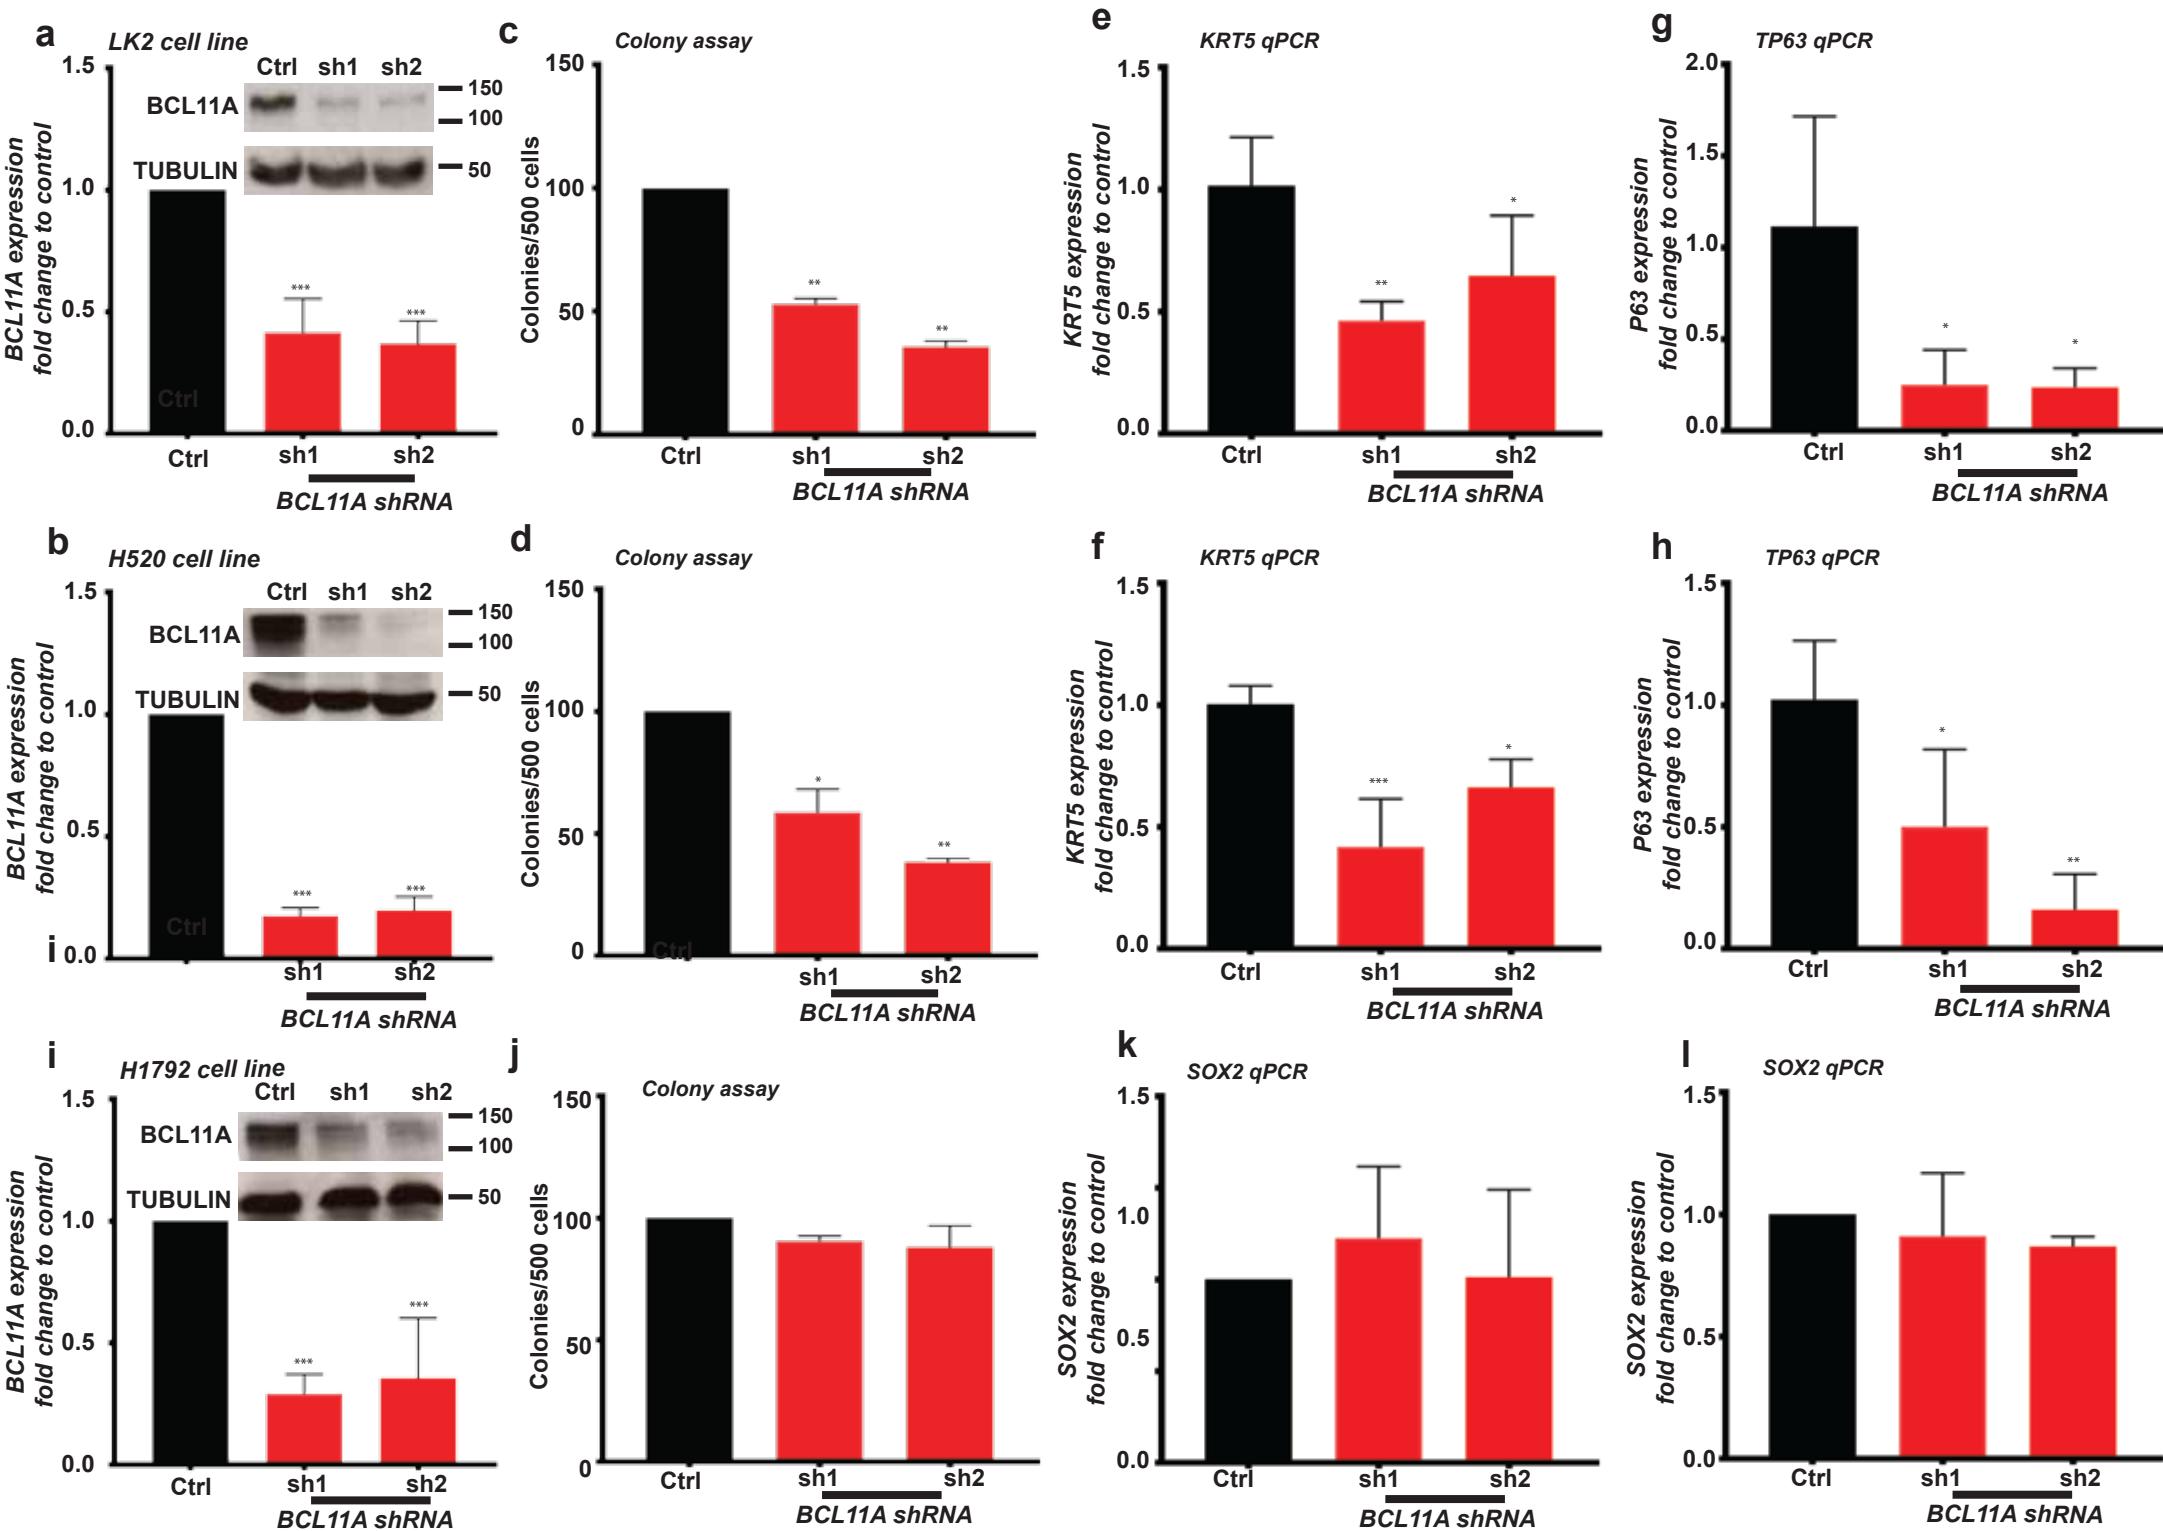



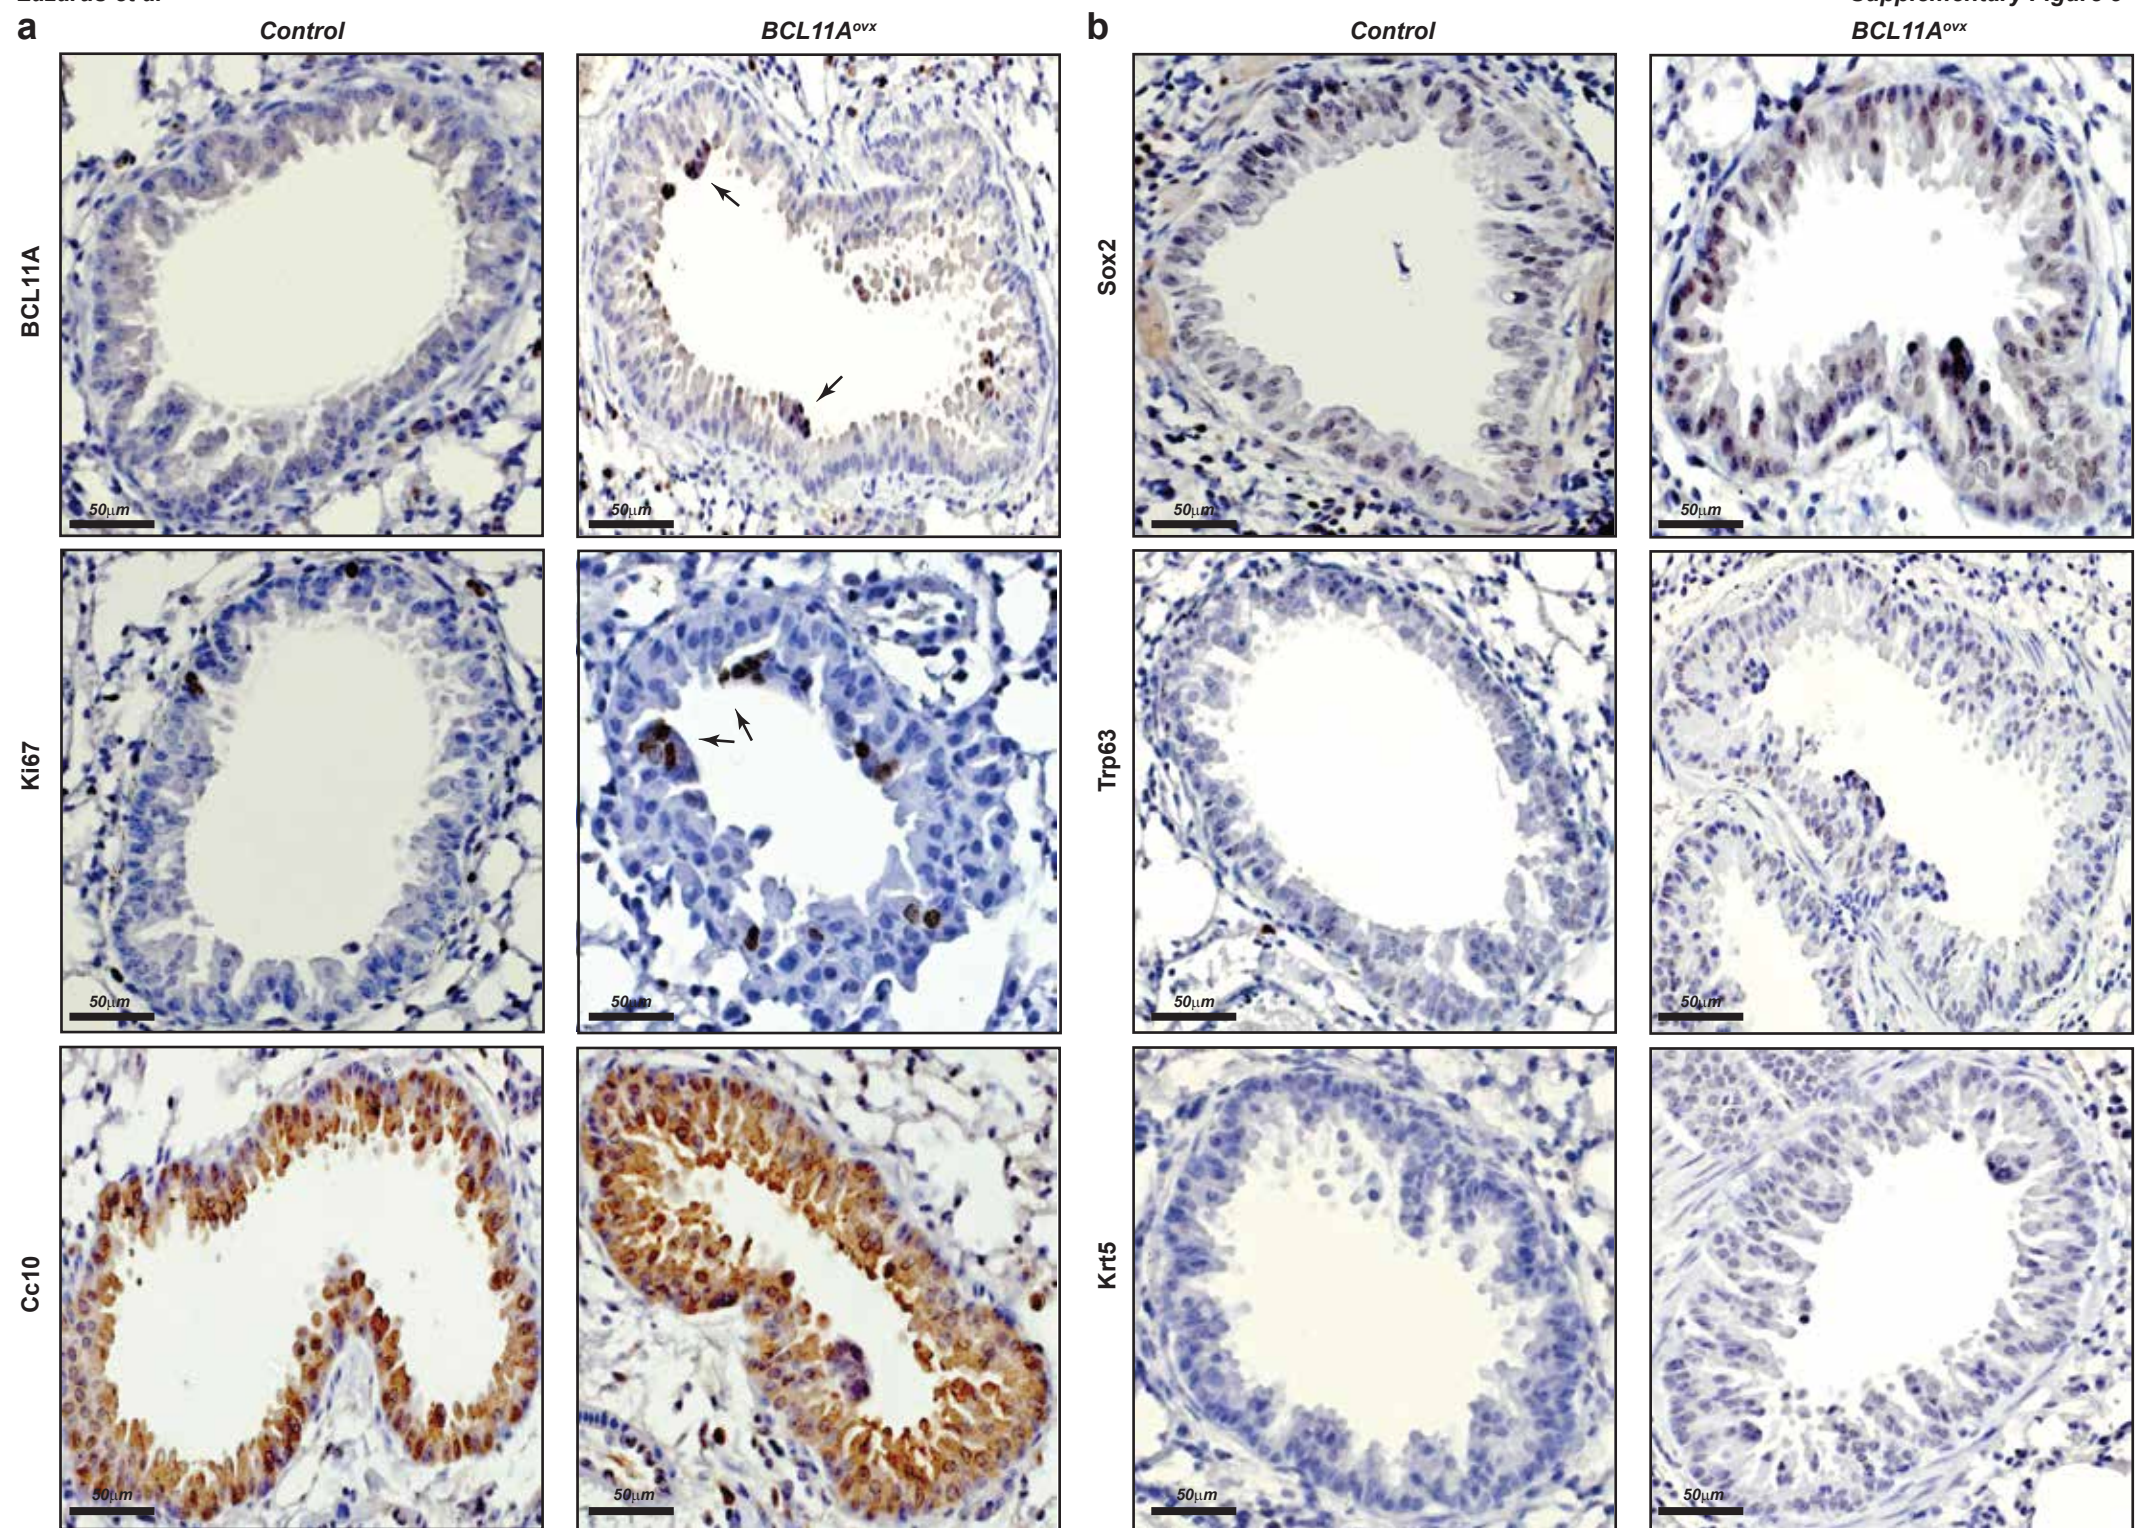

**a** Data from Weeden et al, Plos Biology 2016

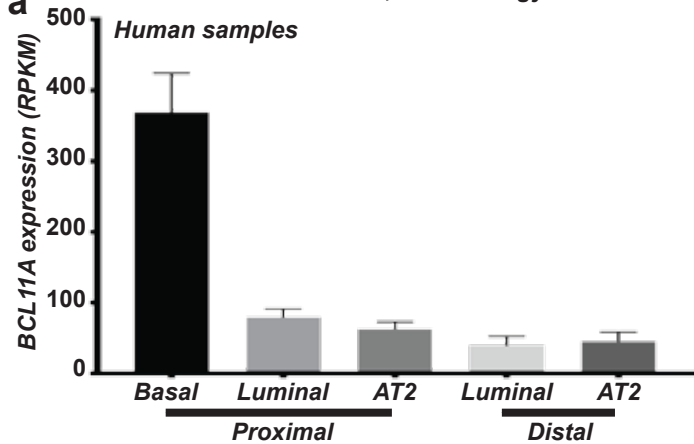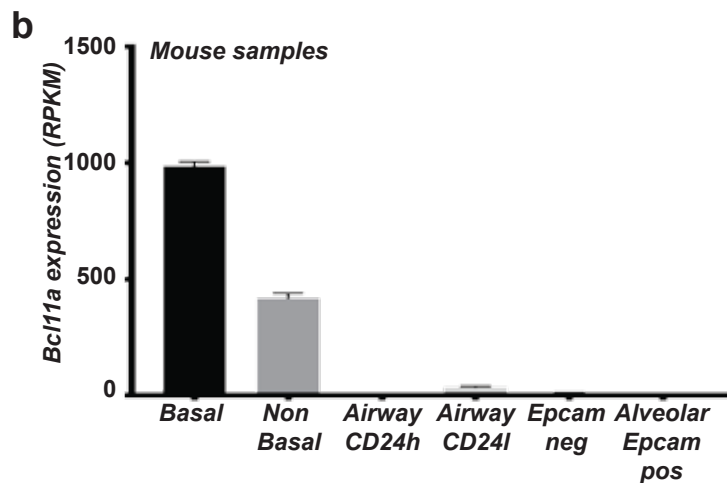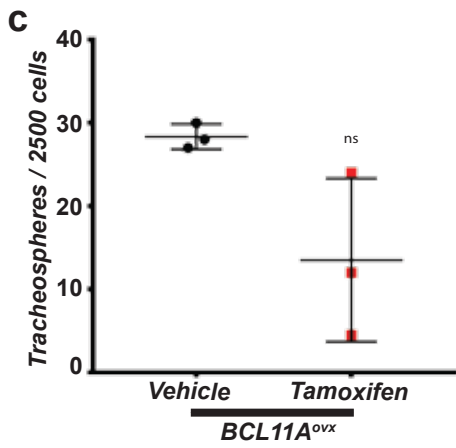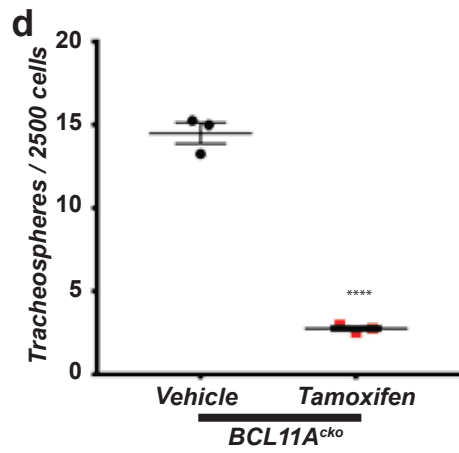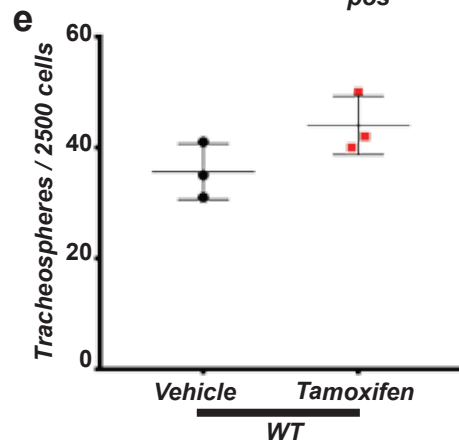



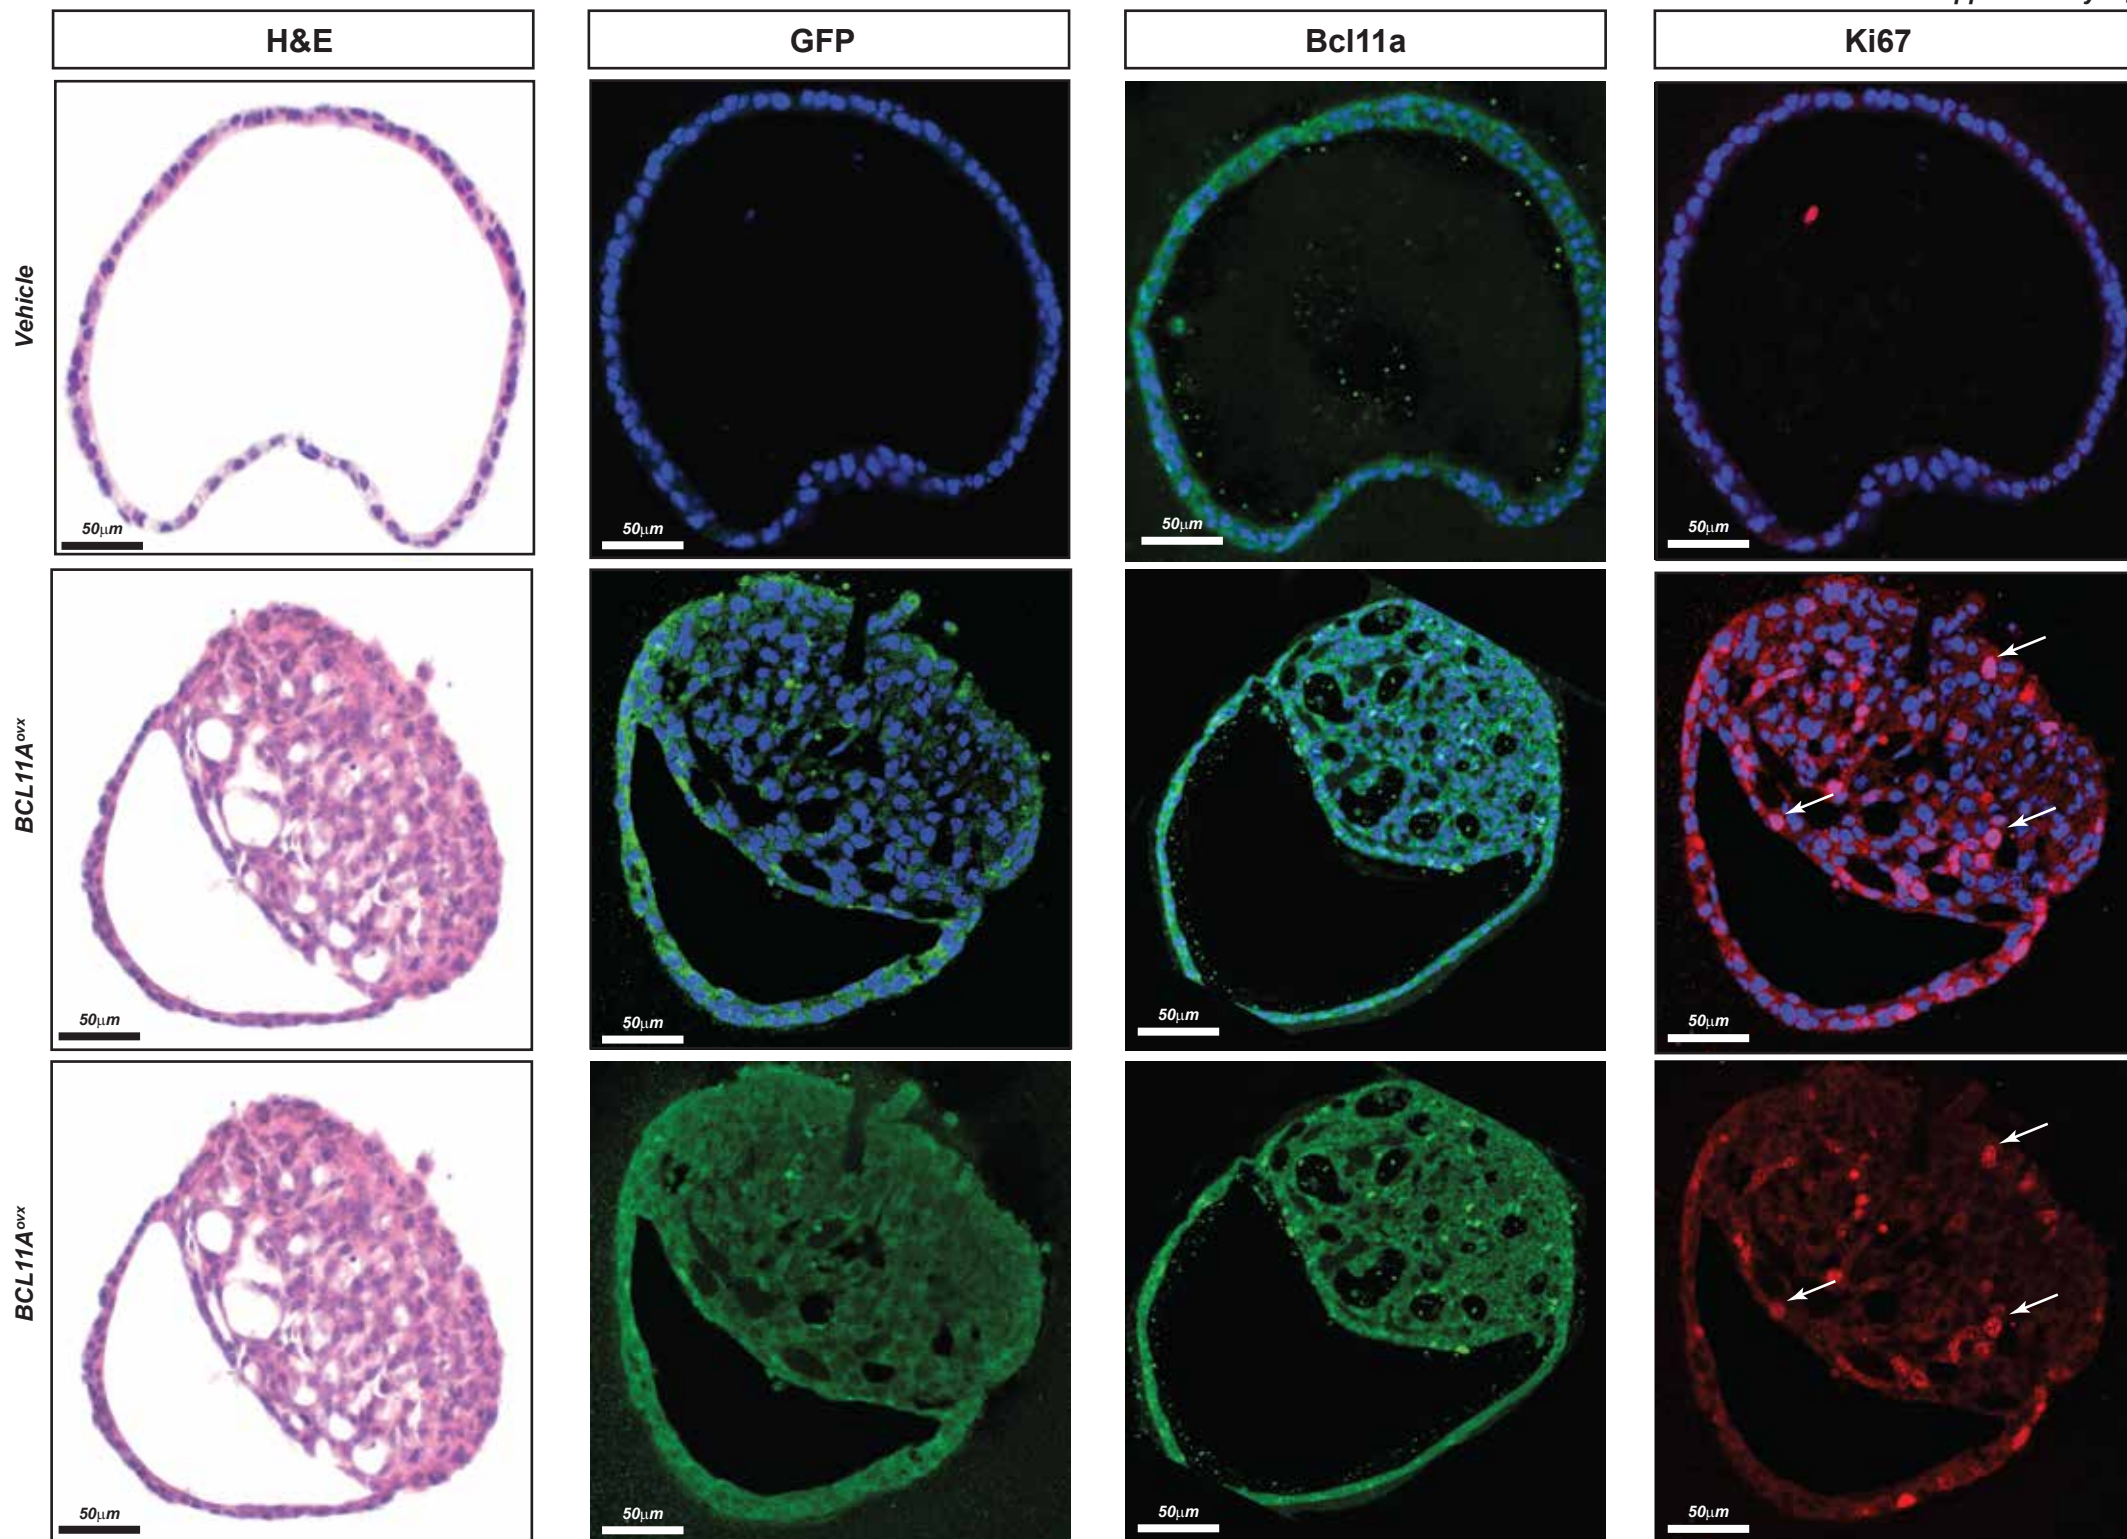



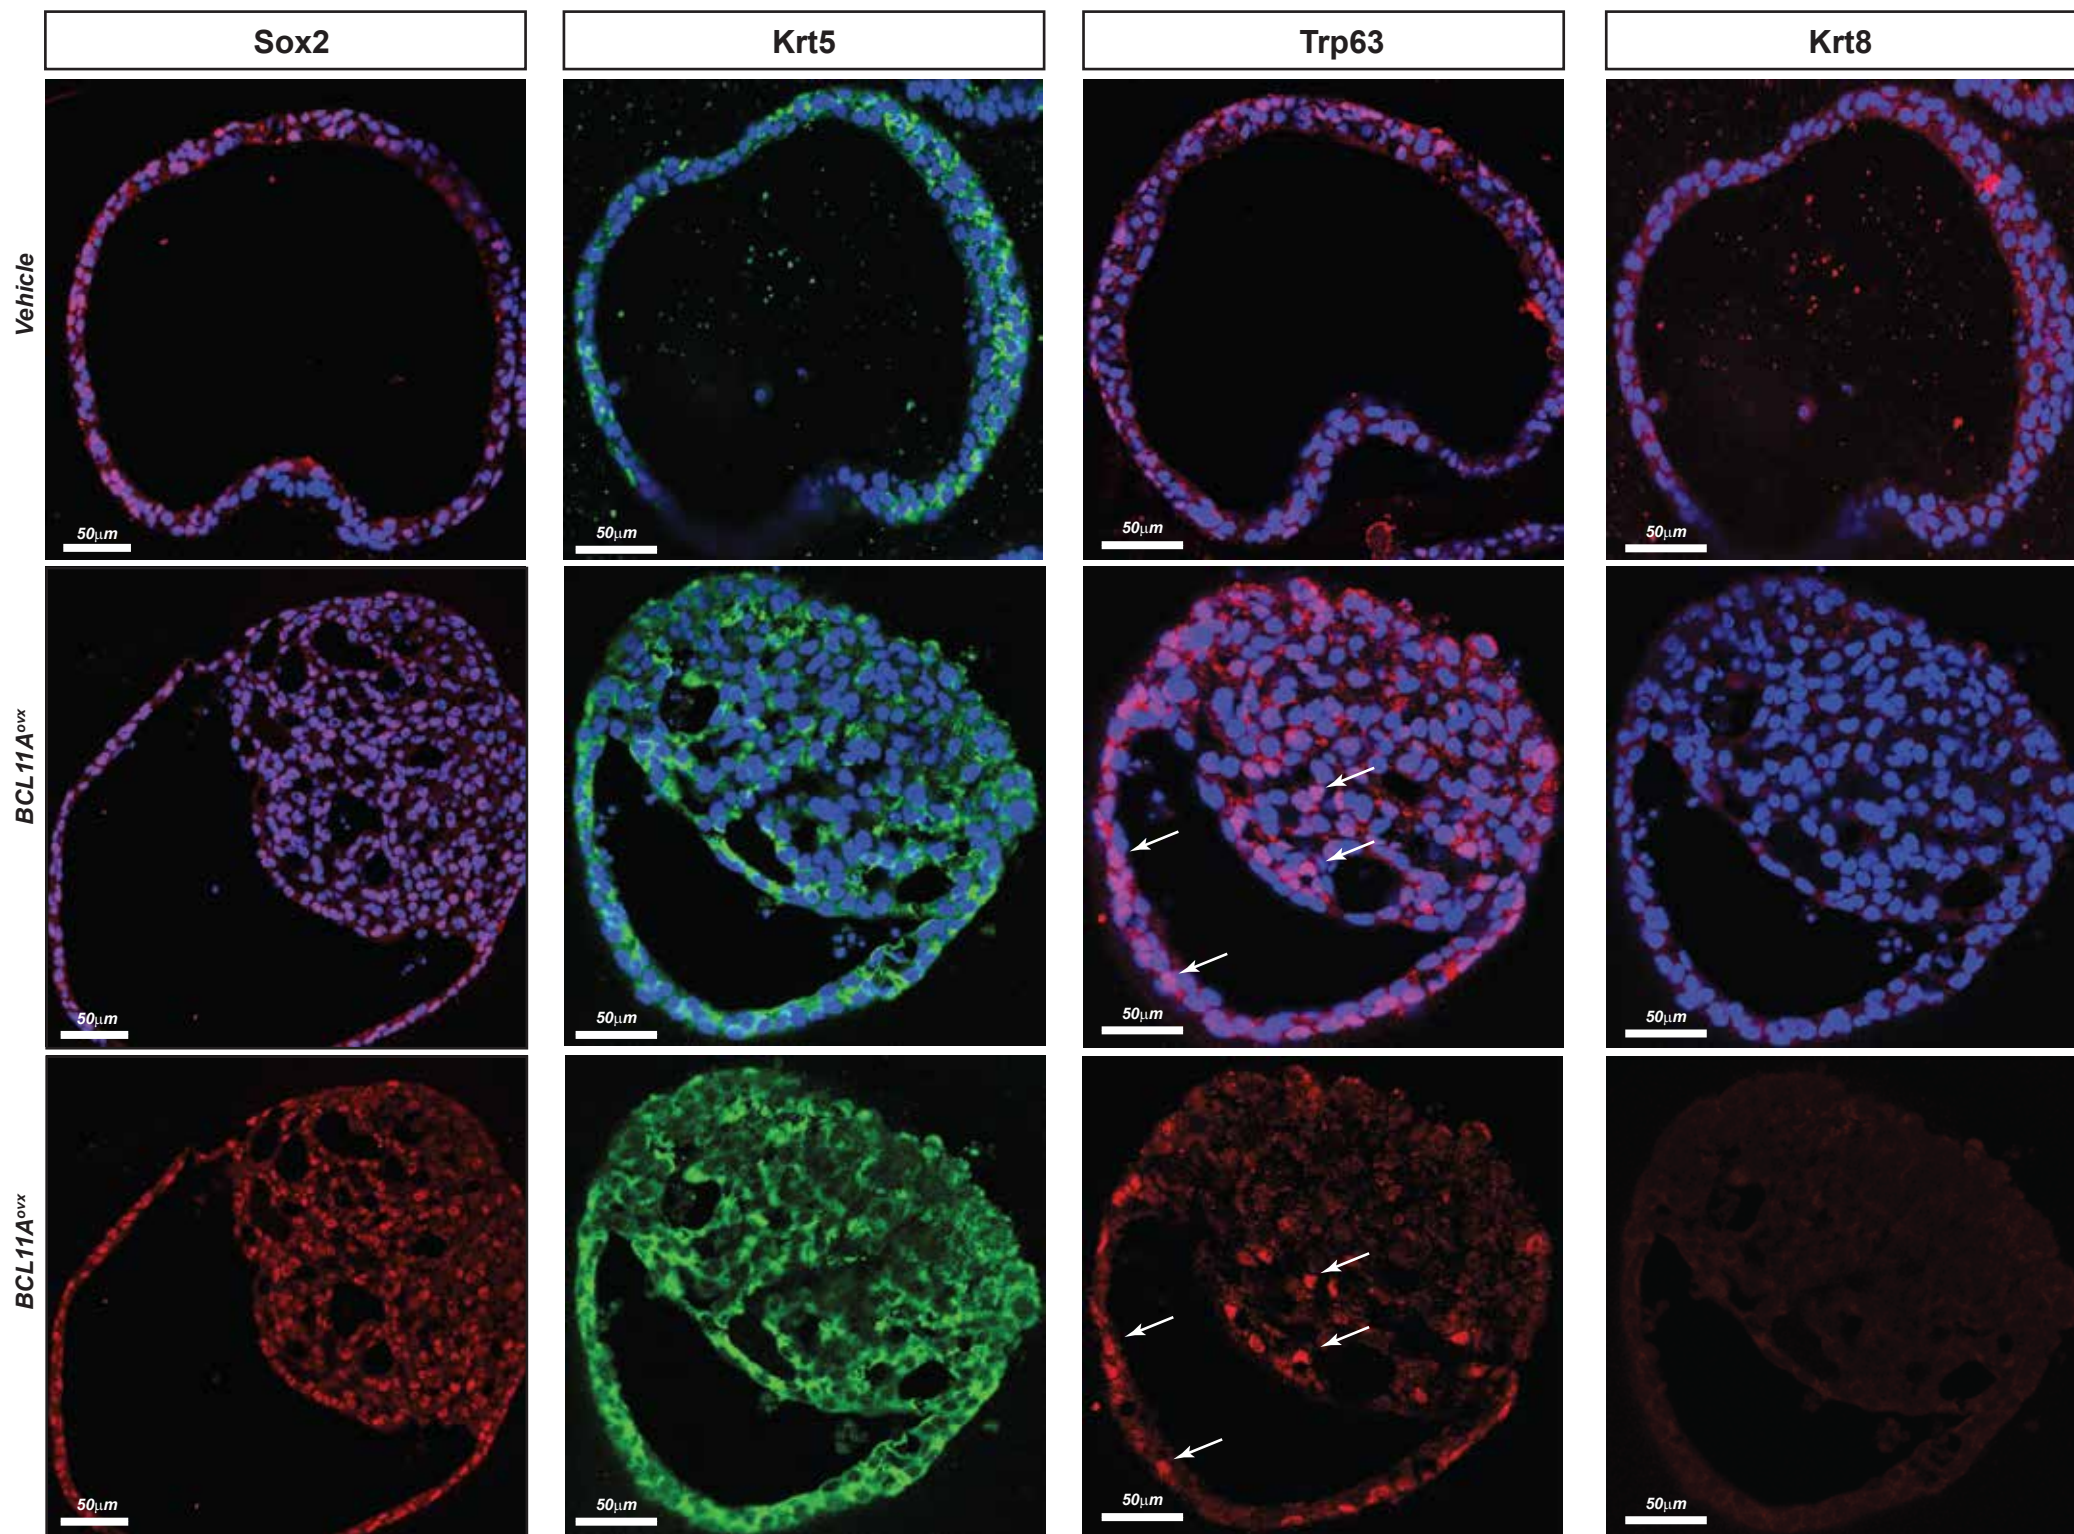



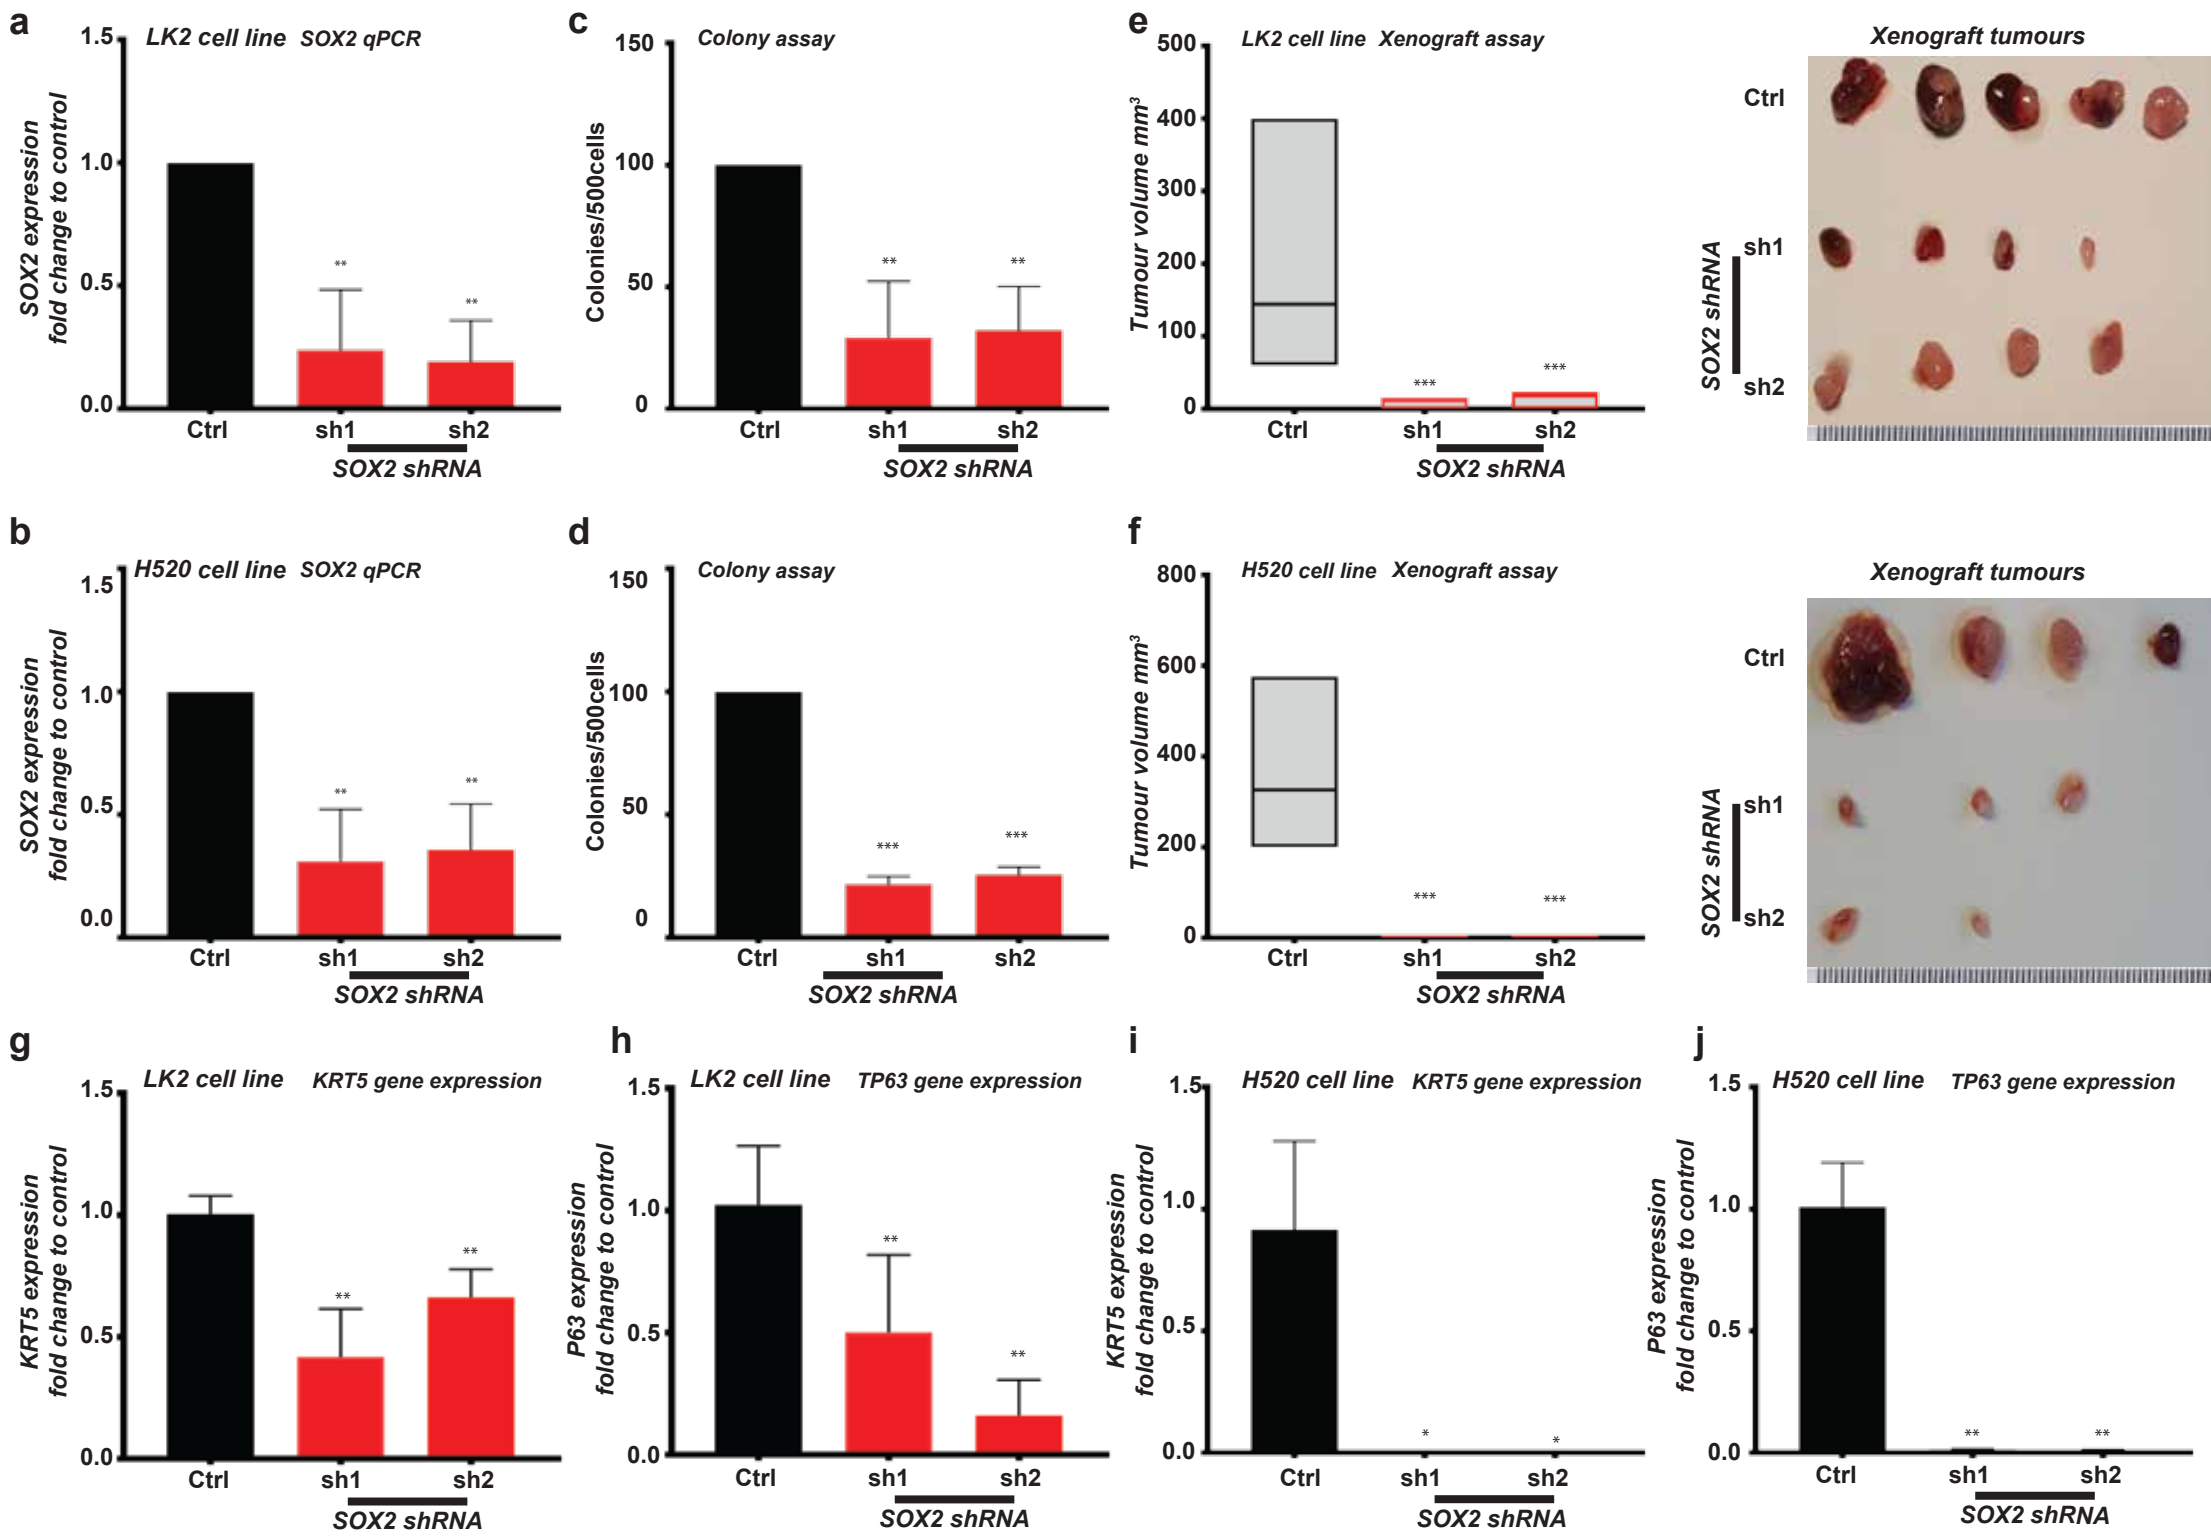

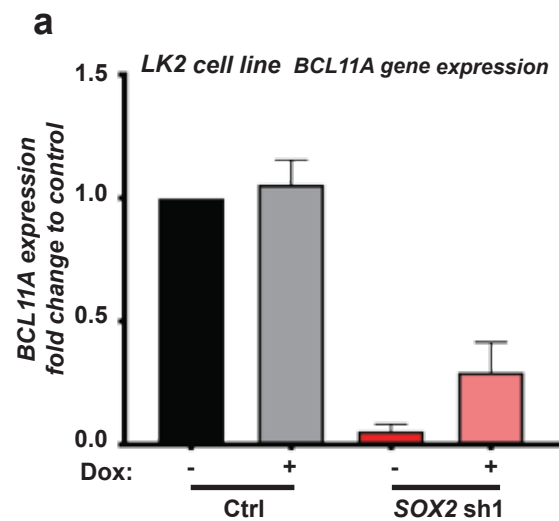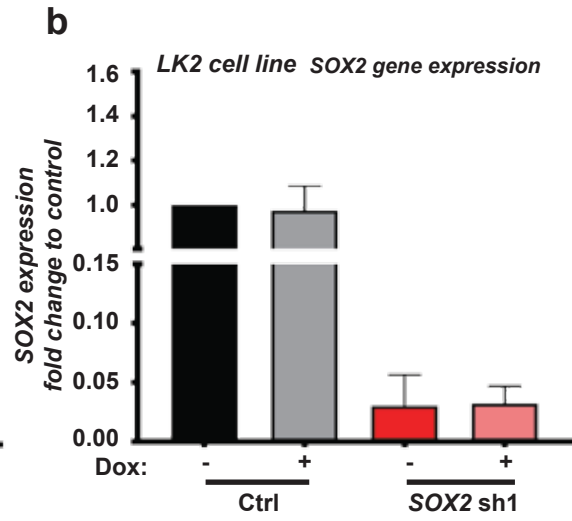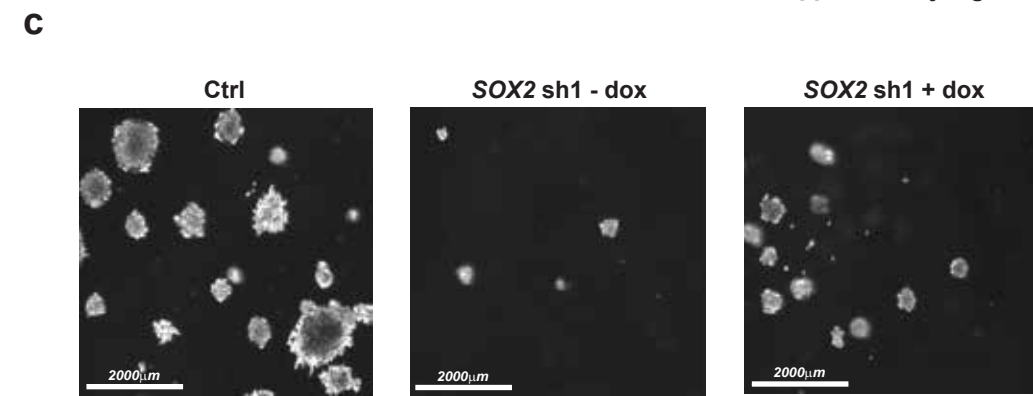

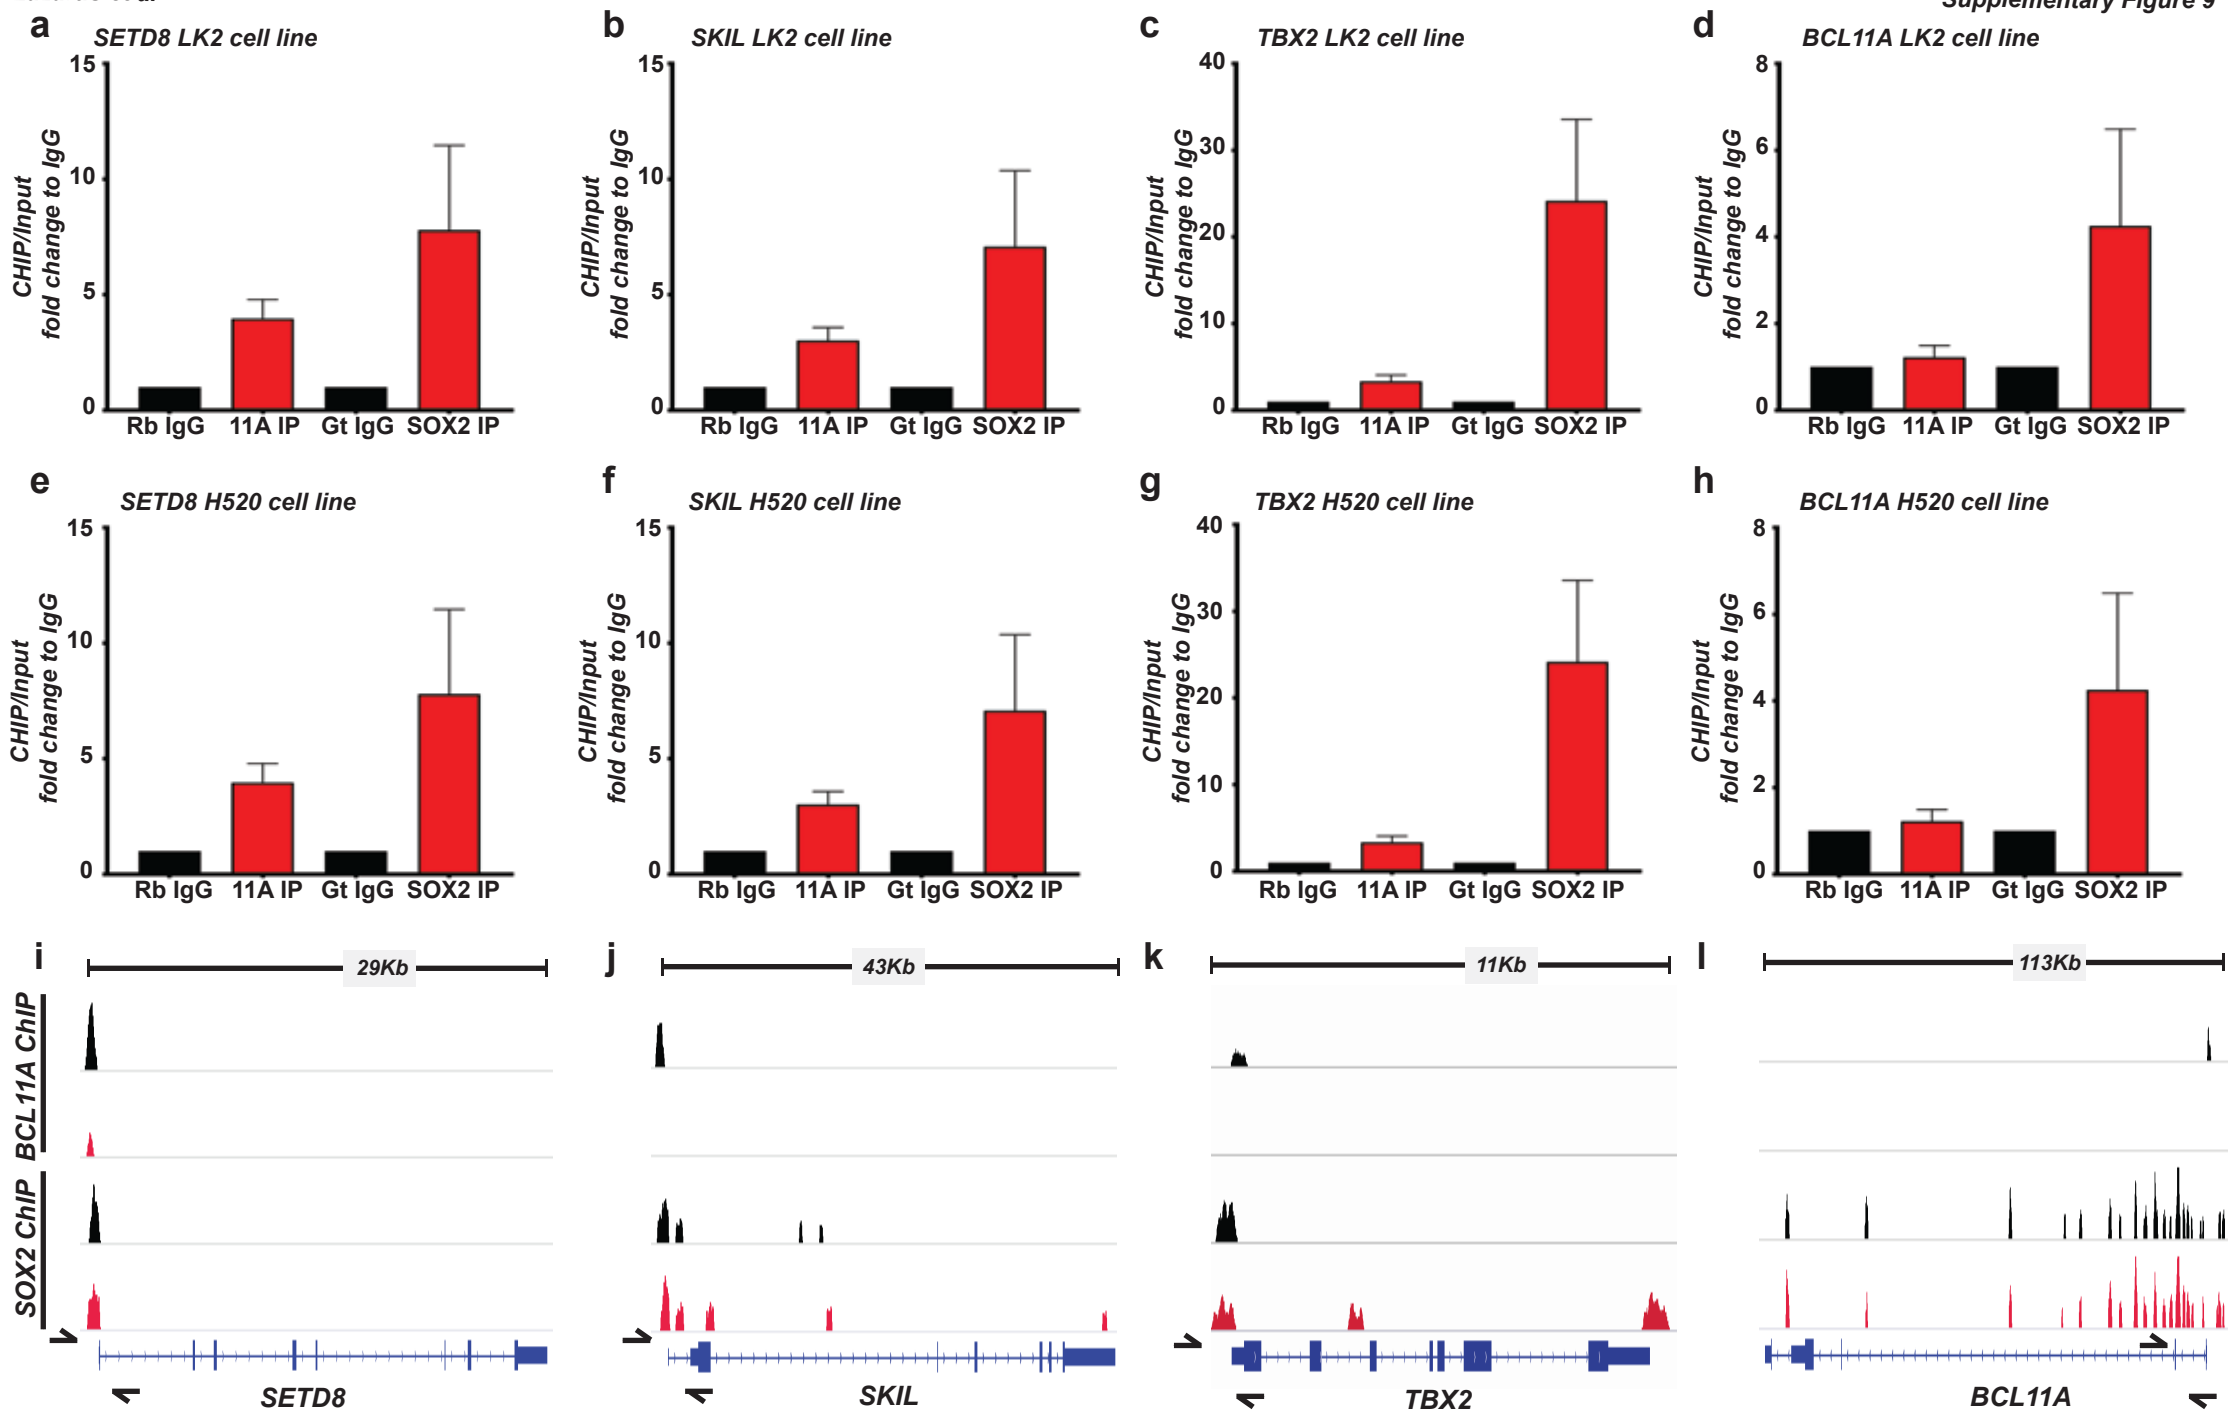

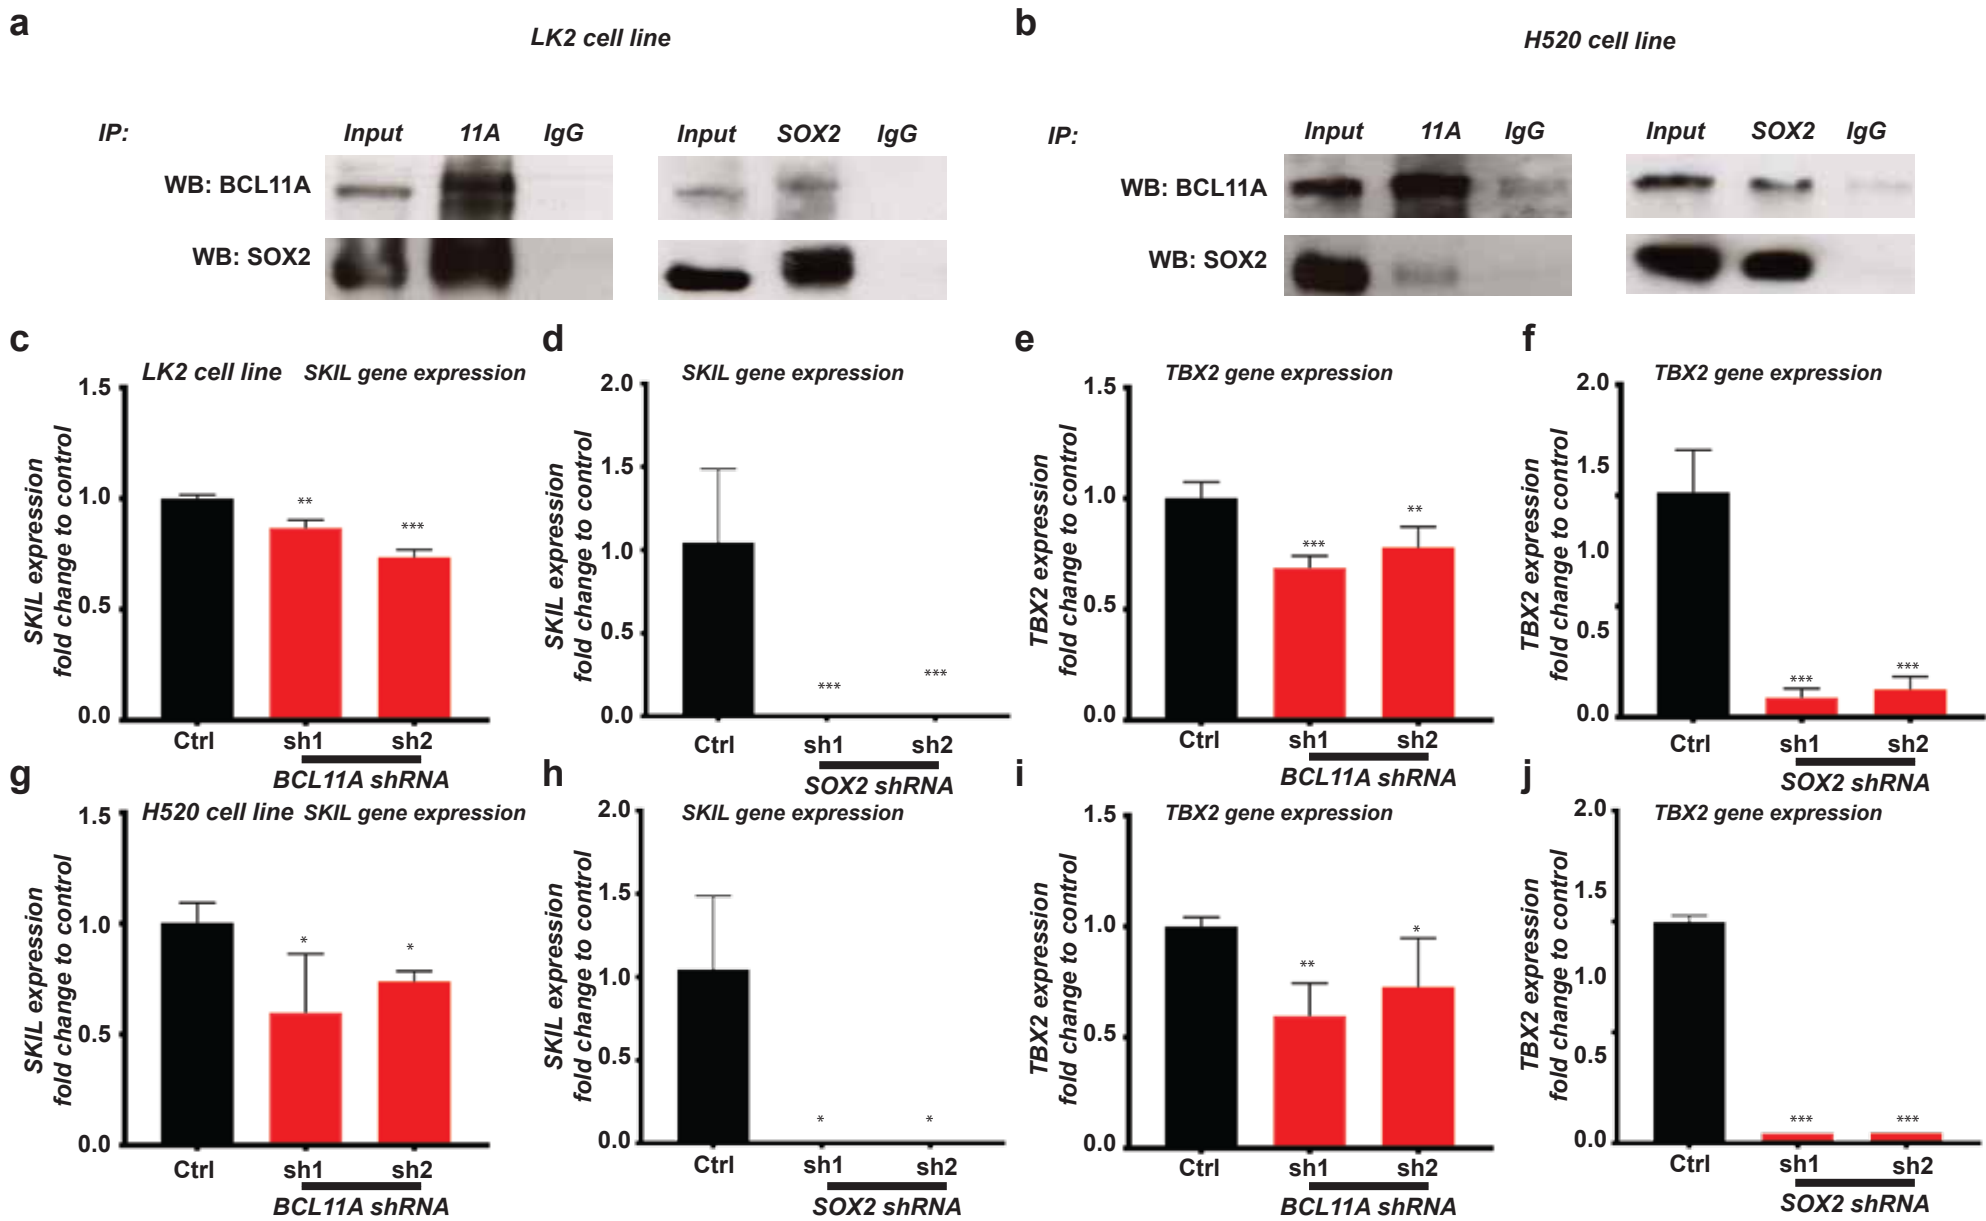

**a**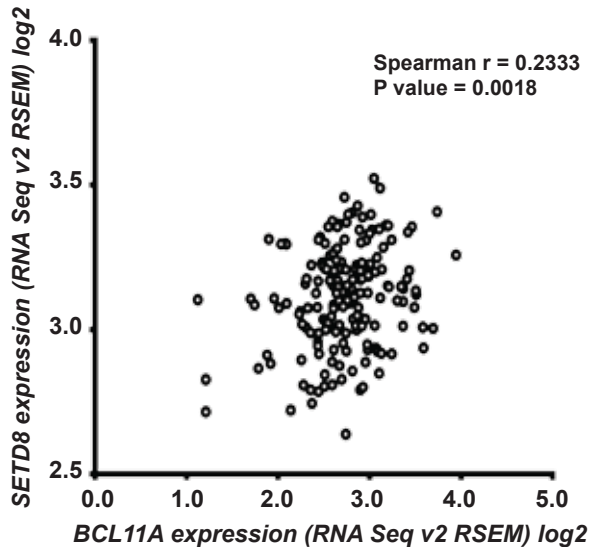**b**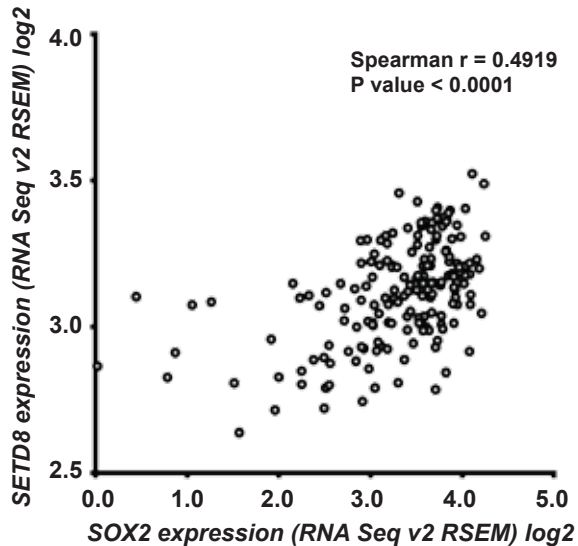

Source: https://www.biorxiv.org/content/biorxiv/early/2017/11/22/223776.full.pdf
